# Supplementary material
Source: MDPI journal article supplement (https://www.mdpi.com/1424-2818/14/9/741)
Supplement: s1 [file s1]

Archive with 3 entries (3 files):
- Copy of S1 Table. Pterosaur Fossils on the African Continent.xlsx
- S2 File. Character-taxon matrix for phylogenetic analysis.txt
- S3 File. Descriptions of additional fragmentary material.pdf
