# Supplementary material
Source: MDPI journal article supplement (https://www.mdpi.com/1424-2818/14/9/741)
Supplement: s1 [file s1 › Copy of S1 Table. Pterosaur Fossils on the African Continent.xlsx]

## Sheet: Sheet1
Country	Geological Setting	Locality	Age	Attribution	Material	Specimen Number(s)	Citation(s)
Angola	Mocuio Formation	Bentiaba	Maastrichtian	Epapatelo otyikokolo	humerus fragment, 2 ulnae, radius	MGUAN-PA 650-651, MGUAN-PA 661-662	Fernandes et al. 2022
	Mocuio Formation	Bentiaba	Maastrichtian	ornithocheirid (Pteranodontia indet.)	femur	MGUAN-PA 163	Mateus et al. 2012 [10] (Fernandes et al. 2022)
Cameroon	Logbadjeck Formation, Douala Sub-basin	Sikoum	Campanian	pterosauria indet.	vertebra	N/A	Ntamak-Nida et al. 2006 [71]
Congo	Middle Beaufort group (Karoo Supergroup), Kwanga Series	Bibanga (Sankuru) (Katanga-Kasai border)	Cretaceous (Cenomanian/Turonian)?	Ornithocheiridae'	metacarpal IV fragment	RGP 2091	Swinton, 1948 [72]; Wellnhofer, 1999 [73]
Kenya	Lapurr Range sandstone (Turkana Grits])	west Turkana	Cretaceous (Turonian/Campanian)?	Azhdarchidae	caudal cervical vertebra	KNM-WT 47893	O'Connor et al., 2011 [74]
Madagascar	Mahajanga Basin, Isalo "Group"	between Ambondromamy and Ambalanjanakomby	Jurassic (Bathonian)	Rhamphorhynchoidea	4 teeth	MSNM V5170-5173	Dal Sasso & Pasini, 2003 [75]
	Mahajanga Basin, Isalo IIIb	Ambondromamy	Jurassic (Bathonian)	Rhamphorhynchoidea	400+ teeth, caudal vertebra	N/A	Flynn et al. 2006 [76]
Morocco	northern Kem Kem Group	west of the Hamada du Guir, Ksar es Souk province	Cretaceous (Albian/Cenomanian)	Siroccopteryx moroccensis [anhanguerid] (formerly Coloborhynchus moroccensis)	rostrum fragment with teeth	LINHM 016	Kellner & Mader, 1997 [77]; Mader & Kellner, 1999 [78]
	Kem Kem Group	region of Hamada du Guir, Ksar es Souk	Cretaceous (Albian/Cenomanian)	Azhdarchidae	cervical vertebra	LINHM 014	Kellner & Mader, 1996 [79]; Kellner et al. 2007 [2]
	Kem Kem Group	region of Hamada du Guir, Ksar es Souk	Cretaceous (Albian/Cenomanian)	Anhanguera sp.	teeth	LINHM 007	Kellner & Mader, 1996 [79], 1997 [77]; Mader & Kellner, 1999 [78]; Kellner et al. 2007 [2]
	Kem Kem Group	Takmout	Albian-Cenomanian	Afrotapejara zouhri [tapejarid]	jaw fragment	FSAC-KK 5004	Martill et al. 2020 [80]
	Kem Kem Group	Boumerade	Cenomanian	Alanqa saharica [thalassodromine]	section of mandibular symphysis	FSAC-KK 31	Ibrahim et al. 2010 [81]
	Kem Kem Group	Aferdou N’Chaft	Cenomanian	Azhdarchidae	mandibular symphysis, rostrum fragment, and a cervical vertebra fragment	FSAC-KK 26; 27; 34	Ibrahim et al. 2010 [81]
	Kem Kem Group	Hamada du Guir, Taouz	Albian/Cenomanian	pteranodontid	jaw fragment	MN 7054-V	Kellner et al., 2007 [2]
	Kem Kem Group	Hassi el Begaa near Taouz, Er Rachidia Province	Cretaceous	Alanqa saharica [thalassodromine]	mandibular symphysis fragment	FSAC-KK 4000	Martill & Ibrahim, 2015 [82]
	Kem Kem Group	Hassi el Begaa, Er Rachidia Province	Albian-lower Cenomanian	Xericeps curvirostris	mandible fragment	FSAC-KK 10700	Martill et al. 2018 [83]
	Kem Kem Group	Aferdou N'Chaft(?), Hassi el Begaa, Er Rachidia Province	Albian-Cenomanian(?)	Coloborhynchus fluviferox ['ornithocheirid']	rostrum fragment	FSAC-KK 10701	Jacobs et al. 2019 [84]
	Kem Kem Group	Aferdou N'Chaft(?), Hassi el Begaa, Er Rachidia Province	Albian-Cenomanian(?)	Anhanguera cf. piscator	mandible fragment and 2 premaxillae	FSAC-KK 5005; FSAC-KK 5025, SMNK-PAL 45831; FSAC-KK 5024, SMNK PAL 45833	Jacobs et al. 2020 [85]
	Kem Kem Group	region of Hamada du Guir, east of Taouz	Cenomanian	ornithocheirids'	30+ teeth	BSP 1993 IX 4, 590-596	Wellnhofer & Buffetaut, 1999 [73]
	Kem Kem Group	region of Hamada du Guir, east of Taouz	Cenomanian	Tapejarid	rostrum fragments	BSP 1997 I 67	Wellnhofer & Buffetaut, 1999 [73]
	Kem Kem Group	region of Hamada du Guir, east of Taouz	Cenomanian	azhdarchid (Alanqua saharica/Apatorhamphus gyrostega)	jaw fragments	BSP 1993 IX 338; BSP 1996 I 36	Wellnhofer & Buffetaut, 1999 [73] (Ibrahim et al. 2010 [81]/McPhee et al. 2020 [86])
	Kem Kem Group	N/A	Cenomanian	Dsungeripteroidea (Apatorhamphus gyrostega)	jaw fragment	CMN 50859	Rodrigues et al., 2011 [60] (McPhee et al. 2020 [86])
	Kem Kem Group	N/A	Cenomanian	Azhdarchidae	2 mid-cervical vertebrae	CMN 50801; LINHM 014	Rodrigues et al., 2011 [60]
	Kem Kem Group	N/A	Cenomanian	Azhdarchoidea	humerus	CMN 50814	Rodrigues et al., 2011 [60]
	calcareous lens	Anoual, eastern High Atlas Mountains, close to Talsinnt	Cretaceous (Barresian?)	ornithocheirids' & gnathosaurines	teeth	SA 100-105	Knoll, 2000 [87]
	Oulad Abdoun basin	Sidi Daoui, Grand Doui, Khouribga	Maastrichtian	Phosphatodraco mauritanicus	5 cervical vertebrae	OCP DEK/GE 111	Suberbiola et al. 2003 [88]
	Oulad Abdoun basin	phosphate mines	Maastrichtian(?)	Phosphatodraco mauritanicus	two cervical vertebrae	FSAC-OB 12 & 13	Longrich et al., 2018 [17]
	Oulad Abdoun basin	phosphate mines	Maastrichtian(?)	Tethydraco regalis	humerus, two ulnae, femora and tibia	FSAC-OB 1, 199, 200, 201 & 202	Longrich et al., 2018 [17]
	Oulad Abdoun basin	phosphate mines	Maastrichtian(?)	Alcione elainus	humerus, sternum, scapulocoracoid, femur, metacarpals IV, mandible, partial wing, and postcrania	FSAC-OB 2, 4, 207, 156	Longrich et al., 2018 [17]
	Oulad Abdoun basin	phosphate mines	Maastrichtian(?)	Simurghia robusta	humerus	FSAC-OB 7	Longrich et al., 2018 [17]
	Oulad Abdoun basin	phosphate mines	Maastrichtian(?)	Barbaridactylus grandis	humeri, radius, ulna, femur, scapulocoracoid, mandible	FSAC-OB 8, 9, 10, 11, 232	Longrich et al., 2018 [17]
	Oulad Abdoun basin	phosphate mines	Maastrichtian(?)	azhdarchid aff. Quetzalcoatlus	cervical vertebra	FSAC-OB 14	Longrich et al., 2018 [17]
	Oulad Abdoun basin	phosphate mines	Maastrichtian(?)	Sidi Chennane azhdarchid	ulna	FSAC-OB 203	Longrich et al., 2018 [17]
	Kem Kem Group, Ifezouane Formation	Aferdou N'Chaft, near Hassi el Begaa	Cretaceous (Albian/Cenomanian)	Leptostomia begaaensis	partial rostrum and mandibular symphysis	FSAC-KK 5075, 5076	Smith et al., 2020 [89]
	Kem Kem Group, Ifezouane Formation	Aferdou N'Chaft, near Hassi el Begaa	Cretaceous (Albian/Cenomanian)	Apatorhamphus gyrostega	partial anterior rostrum	FSAC-KK 5010; 5011; 5012; 5013; 5014	McPhee et al., 2020 [86]
	Oulad Abdoun Basin	Couche III' phosphate mines: Oued Zem near the village of Ouled Bouali, Khouribga Province	Maastrichtian	Tethydraco regalis	humerus, radius/ulna, parts of the carpus and metacarpus and a first wing phalanx	FSAC CP 251	Labita & Martill, 2020 [90]
Niger	Elrhaz Formation	western edge of the Ténéré Desert	Cretaceous	Ornithocheiridae'	tooth	MNN GAD16	Sereno & Brusatte, 2008 [91]
	Elrhaz Formation	N/A	Aptian	tapejaroid' (azhdarchoid)	left humerus	N/A	Blackburn, 2002 [92] (sensu Andres et al., 2014 [18])
	Elrhaz Formation	N/A	Aptian	Anhangueridae (Lanceodontia)	wing fragment	MNN GAD604	Blackburn, 2002 [92] (sensu Andres et al., 2014 [18])
Senegal	Sénégala Basin	Paki, southeast of Dakar	Cretaceous (Campanian/Maastrichtian)	pterodactyloid (Azhdarchidae indet.)	cervical vertebra, tibia fragment	N/A	Monteillet et al. 1982 [93] (Mader & Kellner, 1999 [78])
South Africa	Elliot Formation	N/A	Jurassic	pterosauria	isolated bones	N/A	Blackbeard & Yates, 2007 [94]
Tanzania	Tendaguru Formation; Oberer Saurier-Mergel Member	N/A	Jurassic (Kimmeridgian/Tithonian)	‘Rhamphorhynchus tendagurensis’ (non-pterodactyloid pterosaur)	radius and ulna	M.B.R 2845	Reck, 1931 [95] (Unwin & Heinrich, 1999 [96])
	Tendaguru Formation; Oberer Saurier-Mergel Member	N/A	Jurassic (Kimmeridgian/Tithonian)	‘Pterodactylus brancai' ´Dsungaripterus brancai´ (Dsungaripteroidea indet.)	tibiotarsus, fibula, first phalanx	M.B.R 2844	Reck, 1931 [95] (Galton, 1980 [97] and Unwin & Heinrich, 1999 [96])
	Tendaguru Formation; Oberer Saurier-Mergel Member	N/A	Jurassic (Kimmeridgian/Tithonian)	‘Pterodactylus maximus ; Pterodactyloidea indet.; Pterodactyloidea indet.	ulna	M.B.R 2842 & M.B.R 2848	Reck, 1931 [95]; Unwin & Heinrich, 1999 [96]; Andres et al., 2014 [18]
	Tendaguru Formation; Oberer Saurier-Mergel Member	N/A	Jurassic (Kimmeridgian/Tithonian)	‘Pterodactylus arningi' (Pterosauria indet.)	first phalanx	M.B.R 2843	Reck, 1931 [95] (Unwin & Heinrich, 1999 [96])
	Tendaguru Formation; Upper Saurian Member	N/A	Upper Jurassic	non-Tapejarid dsungaripterid	two humeri	M.B.R 2828 & 2833	Sayão & Kellner, 2001 [98]; Costa & Kellner, 2009 [99]
	Tendaguru Formation; Upper Saurian Member	N/A	Upper Jurassic	ctenochasmatid (azhdarchid)	two cervical vertebrae	M.B.R 2823 & 2832	Andres & Ji, 2008 [61] (Costa et al. 2014 [100])
	Tendaguru Formation; Upper Saurian Member	N/A	Upper Jurassic	pterodactyloid	coracoid	M.B.R 2830	Sayão & Kellner, 2001 [98]; Costa et al., 2014 [100]
	Tendaguru Formation; Upper Saurian Member	N/A	Upper Jurassic	Tapejaroidea'	wing metacarpal	M.B.R. 2821	Sayão & Kellner, 2001 [98]; Costa et al., 2014 [100]
	Middle Saurian Beds	N/A	Kimmeridgian/Tithonian	Tendaguripterus recki (Germanodactylidae/Tendaguripteridae)	mandibular symphysis fragment	M.B.R 1290	Unwin & Heinrich, 1999 [96]
Tunisia	Chenini Formation	Tataouine region	Albian	ornithocheirid'	tooth	N/A	Benton et al., 2000 [25]
	Chenini Formation; Douret Sand Member	"Continental Intercalaire" deposits	Early Cretaceous	ornithocheirid'	teeth	N/A	Fanti et al., 2012 [101]
	Aïn el Guettar Formation; Oum ed Diab Member	Tataouine Governorate	Early Cretaceous, Albian	Ornithocheiridae'	tooth	RH45 - 1a	Martill et al., 2018 [102]
