# Supplementary material
Source: MDPI journal article supplement (https://www.mdpi.com/1424-2818/14/9/741)
Supplement: s1 [file s1 › S2 File. Character-taxon matrix for phylogenetic analysis.txt]

nstates cont;
mxram 200;
xread
'Appendix: Taxon-character matrix for the phylogenetic analysis of an Angola pterosaur and the relationships of the Pterosauria in TNT format. Data partitioned into continuous and discrete sets with settings, character names and states, and analysis commands listed at end. The analysis can be repeated by placing this file in your home directory and executing it in TNT using the command: PROCEDURE Angola_Pterosaur_Matrix.tnt;'
271 132
&[continuous]
Euparkeria_capensis              0.184 0.057 0.646 0.036 0.000 0.000 0.679 0.453 ? ? 0.419 0.612 0.144 1.000 0.665 0.056 0.088 0.074 ? 0.398 0.044 0.019 0.446 0.000 0.079 0.294 0.795 ? 0.000 ? 0.204 0.628 ? 0.042 0.082 0.712 ? ? ? ? ? 0.130 0.000 0.631 0.014 0.995 0.655 0.241 0.056 0.148 0.216 
Ornithosuchus_longidens          0.093 0.137 0.564 0.043 0.397 ? 1.000 0.425 ? ? 0.540 0.454 ? ? 0.677 0.032 0.666 0.000 ? ? 0.096 0.026 0.153 0.125 0.087 0.188 0.530 ? 0.135 ? 0.165 0.999 ? 0.001 0.106 0.235 ? ? ? ? ? 0.112 0.022 0.668 0.000 0.995 0.831 0.434 0.294 0.379 0.685 
Herrerasaurus_ischigualastensis  0.133 ? 0.795 0.010 0.071 0.186 0.583 0.572 ? ? 0.374 0.851 ? 0.863 0.726 0.064 0.704 0.118 ? 0.417 0.062 ? 0.128 0.000 0.107 0.105 ? ? 0.061 ? 0.208 0.788 ? 0.021 0.051 0.487 0.000 ? ? ? ? 0.085 0.078 1.000 0.061 1.000 0.932 0.334 0.071 0.142 ? 
Scleromochlus_taylori            ? 0.182 0.633 0.161 0.080 ? 0.495 0.937 ? ? 0.995 1.000 0.122 0.697 0.523 0.050 0.072 0.214 ? 0.390 0.046 0.000 0.733 0.250 0.121 0.216 0.999 ? 0.350 ? 0.228 0.525 ? 0.000 0.000 1.000 0.001 ? ? ? ? 0.000 0.238 0.754 0.199 0.995 0.828 0.529 0.321 0.255 0.340 
Eudimorphodon_ranzii             0.166 0.267 0.473 0.280 0.399 0.415 0.079 0.000 ? ? 0.757 ? ? ? 0.814 0.109 0.042 0.250 ? 0.754 0.010 0.075 0.760 0.250 ? ? 0.315 ? 0.327 ? 0.632 0.469 0.292 0.170 0.487 0.572 ? ? ? ? 0.271 ? ? 0.245 ? ? ? ? ? ? ? 
Eudimorphodon_rosenfeldi         0.076 0.231 0.344 0.280 0.504 0.573 0.208 0.384 ? ? 1.000 0.430 ? 0.392 0.664 0.054 0.254 0.178 ? 0.802 0.012 0.077 0.801 ? 0.835 0.978 0.250 ? 0.386 ? 0.550 0.448 0.249 0.114 0.425 0.465 0.406 0.410 0.682 0.760 ? ? 0.132 0.118 0.490 0.918 0.623 1.000 0.220 0.465 1.000 
Eudimorphodon_cromptonellus      ? ? ? ? ? ? ? ? ? ? ? ? ? ? ? 0.036 ? ? ? ? ? ? ? ? ? 0.409 0.596 ? ? ? 0.368 0.603 ? 0.116 0.420 0.485 0.268 0.593 0.827 ? ? ? ? 0.338 0.168 0.679 1.000 ? ? ? ? 
Peteinosaurus_zambellii          ? ? ? ? ? ? ? ? ? ? ? ? ? ? ? 0.137 ? ? ? ? ? ? ? ? ? ? ? ? ? ? ? ? ? ? ? 0.580 ? 0.341 ? 0.716 ? ? 0.163 ? ? 0.865 0.488 ? ? ? ? 
Caviramus_schesaplanensis        ? ? ? ? ? ? ? ? ? ? ? ? ? ? ? 0.056 0.116 0.075 ? ? ? ? ? ? ? ? ? ? ? ? ? ? ? ? ? ? ? ? ? ? ? ? ? ? ? ? ? ? ? ? ? 
Raeticodactylus_filisurensis     0.129 0.201 0.511 0.286 0.271 0.277 0.445 0.478 ? ? 0.482 0.593 ? ? 0.644 0.066 0.229 0.124 ? 0.589 0.028 0.109 0.871 ? ? ? ? ? 0.562 ? 0.515 ? 0.127 ? ? ? 0.381 0.431 0.726 ? ? ? ? 0.040 0.535 0.431 0.621 ? ? ? ? 
Austriadactylus_cristatus        0.206 0.198 0.373 0.167 0.465 0.269 0.291 0.305 ? ? 0.481 0.301 0.216 0.576 0.679 0.089 0.113 0.236 ? 0.662 0.015 0.050 ? ? 0.456 0.492 0.335 ? 0.385 ? 0.567 0.527 ? 0.107 ? ? 0.333 0.487 0.742 0.764 ? ? ? ? ? ? ? ? ? ? ? 
Preondactylus_buffarinii         0.162 0.628 0.495 0.111 0.671 0.519 0.500 0.340 ? ? 0.473 ? ? ? 0.794 0.058 0.036 0.348 ? 0.601 0.024 0.047 0.505 0.250 1.000 0.511 ? ? 0.779 ? 0.565 0.498 0.172 0.110 0.435 0.649 0.301 0.597 0.846 0.683 1.000 ? 0.194 0.305 0.432 0.610 0.583 0.944 0.468 0.895 ? 
Dimorphodon_macronyx             0.176 0.407 0.531 0.202 0.999 0.143 0.495 0.079 ? ? 0.204 ? ? ? 0.732 0.113 0.116 0.201 0.000 0.716 0.018 0.093 0.718 0.250 0.239 0.788 0.321 ? 0.379 ? 0.513 0.411 0.102 0.108 0.547 0.756 0.311 0.546 0.933 0.884 0.227 0.484 0.221 0.234 0.507 0.430 0.405 0.712 0.607 0.999 0.954 
Parapsicephalus_purdoni          0.203 ? ? ? ? 0.260 ? 0.530 ? ? 0.380 ? 0.162 0.791 ? ? ? ? ? ? ? ? ? ? ? ? ? ? ? ? ? ? ? ? ? ? ? ? ? ? ? ? ? ? ? ? ? ? ? ? ? 
Campylognathoides_liasicus       0.152 0.166 0.442 0.245 0.647 0.249 0.137 0.454 ? ? 0.722 0.421 0.004 0.602 0.747 0.044 0.106 0.213 ? 0.740 0.038 0.073 1.000 0.375 0.325 0.543 0.230 ? 0.265 ? 0.474 0.377 0.271 0.116 0.659 0.471 0.514 0.527 0.634 0.650 0.065 0.371 0.617 0.100 0.333 0.561 0.711 0.451 0.104 0.197 0.533 
Campylognathoides_zitteli        0.089 0.000 0.608 0.336 0.465 0.388 0.216 0.488 ? ? 0.650 ? ? ? 0.724 0.054 0.176 0.112 ? 0.694 0.032 0.025 0.739 0.375 0.223 1.000 0.425 ? 0.162 ? 0.334 0.498 0.196 0.101 0.344 0.559 0.827 0.506 0.516 0.526 ? 0.373 0.652 ? 0.395 0.942 0.693 0.453 0.236 0.218 0.735 
Sericipterus_wucaiwanensis       0.224 0.211 ? 0.322 ? ? ? ? ? ? ? 0.488 ? ? ? 0.016 ? ? ? ? 0.057 0.084 0.800 ? ? ? 0.135 ? 0.210 ? ? 0.713 ? ? ? ? 0.350 0.391 ? 0.815 ? ? ? ? ? ? ? ? ? ? ? 
Angustinaripterus_longicephalus  0.218 ? 0.488 0.334 0.462 0.999 0.929 1.000 ? ? 0.508 ? ? ? 0.616 0.024 0.143 0.299 ? ? ? ? ? ? ? ? ? ? ? ? ? ? ? ? ? ? ? ? ? ? ? ? ? ? ? ? ? ? ? ? ? 
Harpactognathus_gentryii         0.185 ? ? ? ? ? ? ? ? ? ? ? ? ? ? 0.016 ? ? ? ? ? ? ? ? ? ? ? ? ? ? ? ? ? ? ? ? ? ? ? ? ? ? ? ? ? ? ? ? ? ? ? 
Cacibupteryx_caribensis          0.138 ? ? ? ? 0.245 ? 0.728 ? ? 0.311 ? 0.088 0.747 ? 0.028 ? ? ? ? ? ? ? ? ? ? ? ? ? ? ? ? ? ? ? ? ? ? ? ? ? ? ? ? ? ? ? ? ? ? ? 
Rhamphorhynchus_muensteri        0.183 0.294 0.298 0.374 0.241 0.410 0.000 0.689 ? ? 0.628 0.325 0.033 0.212 0.698 0.024 0.562 0.252 ? 0.744 0.032 0.067 0.780 0.250 0.256 0.699 0.198 ? 0.243 0.352 0.778 0.493 0.136 0.150 0.609 0.549 0.713 0.410 0.554 0.763 0.134 0.601 0.581 0.172 0.509 0.406 0.824 0.916 0.529 0.507 0.935 
Qinglongopterus_guoi             ? 0.096 0.726 0.359 0.543 ? 0.604 ? ? ? ? ? ? 0.661 0.779 0.016 0.429 0.343 ? 0.690 0.013 0.064 0.588 0.250 0.302 0.311 0.097 ? 0.230 ? 0.745 0.714 0.044 0.133 0.310 0.624 0.497 0.471 0.631 0.506 0.261 ? ? 0.042 0.345 0.587 0.635 0.347 0.533 0.244 0.591 
Nesodactylus_hesperius           ? ? ? ? ? ? ? ? ? ? ? ? ? ? ? ? ? ? ? ? 0.018 0.076 0.879 0.250 0.106 0.629 0.099 ? 0.274 0.271 0.845 0.358 ? 0.155 0.452 0.784 0.833 ? ? ? 0.149 ? ? ? ? ? ? ? ? ? ? 
Dorygnathus_banthensis           0.179 0.251 0.551 0.405 0.662 0.533 0.400 0.308 ? ? 0.445 0.287 0.240 0.508 0.771 0.028 0.411 0.204 ? 0.649 0.033 0.099 0.858 0.250 0.259 0.633 0.295 ? 0.321 ? 0.768 0.634 0.090 0.131 0.573 0.474 0.338 0.655 0.890 0.877 0.157 0.541 0.536 0.155 0.432 0.501 0.603 0.377 0.588 0.247 0.549 
Scaphognathus_crassirostris      0.103 0.331 0.327 0.281 0.343 0.168 0.345 0.301 ? ? 0.480 0.535 ? 0.347 0.656 0.012 0.237 0.130 ? 0.570 0.013 0.098 0.976 0.250 0.135 0.461 0.266 ? 0.350 ? 0.830 0.593 0.084 0.129 0.557 0.640 0.329 0.547 0.741 0.866 0.186 0.404 0.603 0.241 0.257 0.245 0.502 0.258 0.121 0.050 0.591 
Sordes_pilosus                   0.170 0.343 0.242 0.206 0.408 0.236 0.508 0.469 ? ? 0.532 0.641 0.042 0.633 0.597 0.014 0.380 0.295 ? 0.480 0.000 0.085 0.915 0.375 0.225 0.395 0.183 ? 0.540 ? 0.783 0.623 0.109 0.095 0.592 0.630 0.291 0.539 0.729 0.662 0.668 0.363 0.695 0.120 0.476 0.275 0.486 0.139 0.139 0.061 0.116 
Darwinopterus_modularis          0.276 0.621 0.420 0.373 ? ? ? ? 0.569 0.387 0.527 0.282 ? ? 0.574 0.042 0.259 0.530 ? 0.575 0.067 0.089 0.559 0.375 0.492 0.737 0.148 ? 0.416 ? 0.648 0.686 0.438 0.164 0.542 0.798 0.324 0.600 0.914 0.979 0.079 0.601 0.659 0.209 0.425 ? 0.461 0.194 0.370 0.144 0.318 
Wukongopterus_lii                0.231 ? 0.468 0.289 ? ? ? ? 0.684 ? ? ? ? ? 0.587 0.044 0.223 0.230 ? ? 0.069 ? ? 0.375 ? 0.567 0.290 ? ? ? 0.754 ? 0.010 0.161 ? 0.633 0.323 0.690 0.970 1.000 ? ? 0.715 0.194 0.577 0.235 0.477 0.324 0.999 0.147 0.287 
Pterorhynchus_wellnhoferi        0.119 0.848 0.581 0.347 ? ? ? ? 0.728 0.521 0.551 ? ? 0.321 0.611 0.026 0.205 0.259 ? 0.499 0.035 0.190 0.474 0.375 0.366 0.754 ? ? 0.887 ? 0.869 0.443 0.199 0.146 0.692 ? 0.302 0.698 0.836 0.702 ? 0.554 0.636 0.134 0.273 0.225 ? ? ? ? ? 
Changchengopterus_pani           ? ? ? ? ? ? ? ? ? ? ? ? ? ? ? ? ? ? ? ? 0.010 0.029 0.365 0.125 0.107 0.243 0.239 ? 0.188 ? 0.614 0.788 0.521 0.165 0.540 ? 0.427 0.526 0.692 ? ? ? ? 0.136 0.292 0.371 0.538 ? ? ? ? 
Batrachognathus_volans           ? 0.159 0.681 0.000 ? ? ? ? 0.100 0.000 0.690 0.550 0.318 ? 0.772 0.036 0.018 0.192 ? ? 0.010 0.056 0.621 ? ? ? 0.145 ? 0.640 ? 0.759 0.568 ? 0.069 ? 0.779 ? ? ? ? ? ? ? 0.000 0.646 0.160 0.614 0.197 0.000 0.076 0.259 
Jeholopterus_ningchengensis      0.101 0.031 0.841 0.077 ? ? ? ? 0.240 0.006 0.474 ? 0.225 ? 0.842 0.016 0.064 0.229 ? 0.689 0.007 0.055 0.475 0.375 0.000 0.010 0.394 ? 0.640 ? 0.501 0.563 0.062 0.069 0.267 0.760 0.410 0.362 0.337 0.138 0.159 ? 0.830 0.055 0.258 0.354 0.770 0.187 0.002 0.062 0.107 
Anurognathus_ammoni              0.000 0.208 0.524 0.024 ? ? ? ? 0.102 0.035 0.556 0.665 0.251 ? 0.579 0.018 0.177 0.226 ? 0.347 0.025 0.118 0.357 0.375 0.022 0.012 0.238 ? 0.688 ? 0.623 0.588 0.041 0.054 0.490 0.596 0.469 0.275 0.171 ? ? 0.382 0.855 0.125 0.519 0.376 0.806 0.355 0.165 0.217 0.504 
Dendrorhynchoides_curvidentatus  ? 0.103 0.874 0.099 ? ? ? ? ? ? ? ? 0.237 ? ? ? 0.000 0.361 ? ? ? ? 0.481 ? 0.078 0.008 0.219 ? 0.751 ? 0.518 0.674 0.000 0.062 0.336 0.790 0.451 0.298 0.332 ? ? ? ? 0.070 0.420 0.426 0.770 0.133 0.247 0.159 0.245 
Kryptodrakon_progenitor          ? ? ? ? ? ? ? ? ? ? ? ? ? ? ? ? ? ? ? ? ? ? ? ? ? ? ? ? ? ? ? ? ? 0.313 ? 0.751 ? ? ? ? ? ? ? ? ? ? ? ? ? ? ? 
Gnathosaurus_subulatus           0.999 ? ? 0.554 ? ? ? ? 0.299 0.488 0.735 0.114 0.372 0.275 0.686 0.129 ? ? ? ? ? ? ? ? ? ? ? ? ? ? ? ? ? ? ? ? ? ? ? ? ? ? ? ? ? ? ? ? ? ? ? 
Gnathosaurus_macrurus            ? ? ? ? ? ? ? ? ? ? ? ? ? ? ? 0.109 0.540 1.000 ? 0.587 0.483 ? ? ? ? ? ? ? ? ? ? ? ? ? ? ? ? ? ? ? ? ? ? ? ? ? ? ? ? ? ? 
Plataleorhynchus_streptophorodon ? ? ? ? ? ? ? ? ? ? ? ? ? ? ? 0.113 ? ? ? ? ? ? ? ? ? ? ? ? ? ? ? ? ? ? ? ? ? ? ? ? ? ? ? ? ? ? ? ? ? ? ? 
Huanhepterus_quingyangensis      0.731 ? ? ? ? ? ? ? ? ? ? ? ? ? ? 0.089 ? ? ? ? 0.486 0.371 0.000 0.375 ? ? ? ? 0.260 ? 0.790 0.615 ? 0.260 0.503 0.190 0.410 0.355 0.406 0.552 0.000 ? ? 0.225 0.999 ? 0.319 ? 0.137 ? ? 
Moganopterus_zhuiana             0.916 ? 0.564 1.000 ? ? ? ? 0.168 1.000 0.406 ? ? 0.060 0.338 0.052 0.407 0.766 ? 0.362 0.418 ? ? ? ? ? ? ? ? ? ? ? ? ? ? ? ? ? ? ? ? ? ? ? ? ? ? ? ? ? ? 
Elanodactylus_prolatus           ? ? ? ? ? ? ? ? ? ? ? ? ? ? ? ? ? ? ? ? 0.176 0.268 0.388 ? ? ? 0.289 ? 0.584 ? 0.371 0.560 ? 0.251 0.432 0.197 0.387 0.596 0.740 0.613 0.055 0.532 0.563 ? ? ? ? 0.118 0.263 0.032 ? 
Kepodactylus_insperatus          ? ? ? ? ? ? ? ? ? ? ? ? ? ? ? ? ? ? ? ? 0.114 ? ? ? ? ? ? ? ? ? ? ? ? ? ? 0.000 ? ? ? ? ? ? ? 0.171 ? ? ? ? ? ? ? 
Ctenochasma_elegans              0.598 0.589 0.369 0.681 ? ? ? ? 0.000 0.266 0.918 0.296 0.430 0.153 0.738 0.398 0.841 0.516 ? 0.797 0.214 0.188 ? 0.375 0.011 0.036 0.246 ? 0.560 ? 0.470 0.496 0.598 0.320 0.971 0.067 0.387 0.388 0.419 0.582 0.116 0.626 0.927 0.170 0.502 0.201 0.592 0.103 0.233 0.031 0.078 
Pterodaustro_guinazui            0.845 0.857 0.652 0.768 ? ? ? ? 0.028 0.331 0.593 0.057 ? ? 0.890 1.000 0.855 0.561 ? 1.000 0.220 0.214 0.298 0.625 0.061 0.226 0.148 ? 0.537 ? 0.625 0.486 ? 0.322 ? 0.356 0.446 0.440 0.453 0.523 0.120 0.770 ? 0.169 0.597 0.441 0.905 0.224 0.382 0.091 0.152 
Beipiaopterus_chenianus          ? ? ? ? ? ? ? ? ? ? ? ? ? ? ? ? ? ? ? ? 0.199 0.378 0.132 0.375 0.000 0.031 0.190 0.427 1.000 ? 0.558 0.563 0.242 0.316 0.561 0.253 0.251 1.000 1.000 0.977 ? ? ? 0.058 0.960 0.264 0.524 0.078 0.640 0.085 0.365 
Gegepterus_changae               0.768 0.878 0.469 0.748 ? ? ? ? 0.111 0.403 0.557 0.196 ? ? 0.490 0.140 ? 0.684 ? 0.479 0.178 0.207 0.145 ? ? ? ? 0.291 ? ? ? ? ? ? ? ? ? 0.477 ? ? ? 0.544 ? ? ? ? ? ? ? ? ? 
Feilongus_youngi                 0.808 ? 0.528 0.662 ? ? ? ? 0.179 0.618 ? 0.071 ? 0.048 0.330 0.064 0.622 0.637 ? 0.329 0.359 ? ? ? ? ? ? ? ? ? ? ? ? ? ? ? ? ? ? ? ? ? ? ? ? ? ? ? ? ? ? 
Cycnorhamphus_suevicus           0.255 0.381 0.408 0.440 ? ? ? ? 0.377 0.306 0.710 0.650 0.863 ? 0.000 0.000 0.400 0.286 ? 0.000 0.081 0.151 0.335 0.375 0.004 0.082 0.157 ? 0.379 ? 0.524 0.552 0.922 0.523 0.570 0.311 0.596 0.294 0.300 0.429 0.098 0.395 0.712 0.390 0.535 0.215 0.265 ? ? ? ? 
Ardeadactylus_longicollum        0.374 0.581 0.426 0.546 ? ? ? ? 0.330 0.287 0.633 0.301 1.000 ? 0.567 0.046 0.561 0.526 ? 0.491 0.290 0.296 0.344 0.375 0.004 0.048 0.207 ? 0.529 ? 0.512 0.483 0.726 0.534 0.654 0.144 0.576 0.255 0.175 0.333 0.100 0.528 0.614 0.383 0.554 0.082 0.204 ? ? ? ? 
Pterodactylus_antiquus           0.417 0.577 0.362 0.501 ? ? ? ? 0.217 0.263 0.744 0.244 ? ? 0.543 0.067 0.528 0.483 ? 0.527 0.273 0.286 0.352 0.375 0.012 0.042 0.307 ? 0.463 ? 0.550 0.608 0.583 0.300 0.683 0.177 0.360 0.412 0.537 0.558 0.089 0.531 0.859 0.272 0.457 0.255 0.578 0.087 0.441 0.043 0.193 
Normannognathus_wellnhoferi      0.300 ? ? ? ? ? ? ? ? ? ? ? ? ? ? ? ? ? ? ? ? ? ? ? ? ? ? ? ? ? ? ? ? ? ? ? ? ? ? ? ? ? ? ? ? ? ? ? ? ? ? 
Germanodactylus_cristatus        0.247 0.533 0.271 0.427 ? ? ? ? 0.411 0.174 0.512 0.200 ? ? 0.621 0.040 0.564 0.328 ? 0.673 0.154 0.132 0.276 0.375 0.014 0.070 0.261 ? 0.658 ? 0.500 0.555 0.647 0.336 0.705 0.308 0.381 0.410 0.523 0.628 0.189 0.483 0.932 0.245 0.495 0.267 0.504 0.110 0.156 0.010 0.000 
Germanodactylus_rhamphastinus    0.267 0.761 0.471 0.335 ? ? ? ? 0.511 0.246 0.452 0.090 ? ? 0.625 0.046 0.660 0.341 ? 0.517 0.112 0.204 0.200 0.375 ? ? 0.255 ? 0.538 ? 0.635 0.633 ? 0.327 0.680 0.038 0.395 0.300 0.471 0.616 0.093 0.512 1.000 0.300 0.526 0.369 0.468 ? ? ? ? 
Haopterus_gracilis               0.199 0.527 0.395 0.464 ? ? ? ? 0.411 0.763 ? ? ? ? 0.646 0.040 0.660 0.231 ? 0.733 0.025 0.113 0.163 ? ? ? 0.022 ? 0.548 ? 0.627 0.649 0.390 0.366 ? ? 0.587 0.276 0.352 0.277 ? ? ? ? ? ? ? ? 0.287 0.000 0.107 
Aetodactylus_halli               ? ? ? ? ? ? ? ? ? ? ? ? ? ? ? 0.097 0.559 0.649 ? 0.835 ? ? ? ? ? ? ? ? ? ? ? ? ? ? ? ? ? ? ? ? ? ? ? ? ? ? ? ? ? ? ? 
Anhanguera_santanae              0.271 0.646 0.582 0.558 ? ? ? ? 0.353 0.216 0.293 0.167 ? 0.347 0.822 0.068 0.704 0.304 0.335 0.624 0.072 0.144 0.328 0.375 ? ? 0.000 ? ? ? ? 0.144 ? ? 0.551 0.309 ? ? ? ? ? 0.492 0.531 ? ? ? ? 0.005 ? ? ? 
Anhanguera_piscator              0.349 0.566 0.440 0.522 ? ? ? ? 0.298 0.221 0.996 0.148 ? 0.336 0.785 0.077 0.677 0.306 0.337 0.725 0.025 0.104 0.184 0.375 0.050 0.175 0.015 ? 0.500 ? 0.697 0.123 ? 0.305 0.670 0.376 ? ? ? ? ? 0.715 ? 0.215 0.315 ? 0.213 0.000 0.785 ? ? 
Anhanguera_blittersdorffi        0.402 ? 0.433 0.554 ? ? ? ? 0.315 0.278 0.398 0.153 0.172 0.414 0.804 0.087 ? 0.338 0.316 0.733 ? ? ? ? ? ? ? ? ? ? ? ? ? ? ? ? ? ? ? ? ? ? ? ? ? ? ? ? ? ? ? 
Anhanguera_araripensis           0.373 ? ? 0.583 ? ? ? ? 0.235 0.226 0.274 0.071 0.190 0.450 0.796 0.085 ? ? ? ? ? 0.144 ? ? ? ? ? ? ? ? ? ? ? ? ? 0.097 ? ? ? ? ? ? ? ? ? ? ? ? ? ? ? 
Liaoningopterus_gui              0.470 ? ? ? ? ? ? ? ? ? ? ? ? ? ? 0.056 0.487 0.206 ? ? 0.080 ? ? ? ? ? ? ? ? ? ? ? ? ? ? ? ? ? ? ? ? ? ? ? ? ? ? ? ? ? ? 
Siroccopteryx_moroccensis        ? ? ? ? ? ? ? ? ? ? ? ? ? ? ? ? ? ? ? ? ? ? ? ? ? ? ? ? ? ? ? ? ? ? ? ? ? ? ? ? ? ? ? ? ? ? ? ? ? ? ? 
Tropeognathus_mesembrinus        0.319 ? 0.449 0.495 ? ? ? ? 0.441 0.302 0.269 0.081 0.133 0.484 0.671 0.036 0.388 0.328 0.283 0.709 ? ? ? ? ? ? ? ? ? ? ? ? ? ? ? ? ? ? ? ? ? ? ? ? ? ? ? ? ? ? ? 
Coloborhynchus_clavirostris      ? ? ? ? ? ? ? ? ? ? ? ? ? ? ? ? ? ? ? ? ? ? ? ? ? ? ? ? ? ? ? ? ? ? ? ? ? ? ? ? ? ? ? ? ? ? ? ? ? ? ? 
Coloborhynchus_wadleighi         ? ? ? ? ? ? ? ? ? ? ? ? ? ? ? ? ? ? ? ? ? ? ? ? ? ? ? ? ? ? ? ? ? ? ? ? ? ? ? ? ? ? ? ? ? ? ? ? ? ? ? 
Ornithocheirus_simus             ? ? ? ? ? ? ? ? ? ? ? ? ? ? ? ? ? ? ? ? ? ? ? ? ? ? ? ? ? ? ? ? ? ? ? ? ? ? ? ? ? ? ? ? ? ? ? ? ? ? ? 
Brasileodactylus_araripensis     ? ? ? ? ? ? ? ? ? ? ? ? ? ? ? ? ? ? ? ? ? ? ? ? ? ? ? ? ? ? ? ? ? ? ? ? ? ? ? ? ? ? ? ? ? ? ? ? ? ? ? 
Ludodactylus_sibbicki            0.265 ? 0.524 0.558 ? ? ? ? 0.321 0.204 0.394 0.090 ? 0.171 0.842 0.068 0.520 0.272 ? 0.764 ? ? ? ? ? ? ? ? ? ? ? ? ? ? ? ? ? ? ? ? ? ? ? ? ? ? ? ? ? ? ? 
Boreopterus_cuiae                0.390 ? 0.451 0.613 ? ? ? ? 0.179 0.350 0.473 ? ? ? 0.809 0.101 0.940 0.409 ? 0.864 0.079 ? ? ? ? 0.136 ? ? ? ? 0.591 ? 0.442 0.370 ? 0.294 0.483 0.365 0.416 0.553 ? ? ? 0.305 0.134 ? 0.110 ? ? ? ? 
Guidraco_venator                 0.255 ? 1.000 0.597 ? ? ? ? 0.222 0.260 0.369 0.076 ? ? 0.771 0.076 0.761 0.245 ? 0.807 0.017 ? ? ? ? ? ? ? ? ? ? ? ? ? ? ? ? ? ? ? ? ? ? ? ? ? ? ? ? ? ? 
Zhenyuanopterus_longiristris     0.603 0.694 0.555 0.610 ? ? ? ? 0.267 0.354 0.597 0.066 ? ? 1.000 0.161 0.801 0.435 ? 0.978 0.110 0.192 ? 0.500 0.028 0.025 0.295 ? 0.593 ? 0.480 0.200 0.487 0.337 0.688 0.038 0.478 0.244 0.288 0.455 ? ? ? 0.276 0.094 0.367 0.000 ? ? ? ? 
Cearadactylus_atrox              0.293 ? 0.442 0.467 ? ? ? ? 0.357 0.152 ? ? 0.373 ? 0.484 0.050 0.276 0.253 ? 0.456 ? ? ? ? ? ? ? ? ? ? ? ? ? ? ? ? ? ? ? ? ? ? ? ? ? ? ? ? ? ? ? 
Hongshanopterus_lacustris        ? ? ? 0.540 ? ? ? ? 0.276 ? ? 0.244 0.330 0.452 0.593 0.060 ? ? ? ? 0.021 ? ? ? ? ? ? ? ? ? ? ? ? ? ? ? ? ? ? ? ? ? ? ? ? ? ? ? ? ? ? 
Lonchodectes_compressirostris    0.485 ? ? ? ? ? ? ? ? ? ? ? ? ? ? ? ? ? ? ? ? ? ? ? ? ? ? ? ? ? ? ? ? ? ? ? ? ? ? ? ? ? ? ? ? ? ? ? ? ? ? 
Lonchodraco_giganteus            0.147 ? ? ? ? ? ? ? ? ? ? ? ? ? ? ? ? ? ? ? ? ? ? ? ? ? ? ? ? ? ? 0.395 ? ? ? ? ? ? ? ? ? ? ? ? ? ? ? ? ? ? ? 
Cimoliopterus_cuvieri            0.316 ? ? ? ? ? ? ? ? ? ? ? ? ? ? ? ? ? ? ? ? ? ? ? ? ? ? ? ? ? ? ? ? ? ? ? ? ? ? ? ? ? ? ? ? ? ? ? ? ? ? 
Cimoliopterus_dunni              0.855 ? ? ? ? ? ? ? ? ? ? ? ? ? ? ? ? ? ? ? ? ? ? ? ? ? ? ? ? ? ? ? ? ? ? ? ? ? ? ? ? ? ? ? ? ? ? ? ? ? ? 
Nurhachius_ignaciobritoi         0.324 0.575 0.506 0.411 ? ? ? ? 0.845 0.626 0.693 0.186 0.854 ? 0.396 0.035 0.422 0.448 ? 0.356 0.087 0.124 0.412 ? ? ? 0.034 ? 0.437 ? 0.837 0.111 0.399 0.347 0.454 0.213 0.566 0.296 0.342 ? ? 0.461 ? 0.354 0.348 ? 0.056 0.118 0.198 ? ? 
Liaoxipterus_brachyognathus      ? ? ? ? ? ? ? ? ? ? ? ? ? ? ? 0.032 0.367 0.467 ? 0.314 ? ? ? ? ? ? ? ? ? ? ? ? ? ? ? ? ? ? ? ? ? ? ? ? ? ? ? ? ? ? ? 
Istiodactylus_sinensis           0.329 0.853 0.544 0.217 ? ? ? ? 0.924 0.423 0.595 0.153 ? ? 0.240 0.048 0.106 0.332 ? 0.174 0.071 0.121 0.288 ? ? ? 0.077 ? 0.726 ? 0.869 0.147 ? 0.390 0.526 0.270 0.573 0.363 0.416 ? ? ? ? 0.430 0.245 ? ? ? ? ? ? 
Istiodactylus_latidens           0.429 0.847 0.276 0.177 ? ? ? ? 0.545 0.321 0.502 0.119 0.478 ? 0.000 0.040 0.177 0.366 ? 0.170 ? 0.140 0.220 ? ? ? 0.027 ? 0.478 ? 0.855 0.096 0.209 ? 0.408 ? ? ? ? ? ? ? ? 0.209 ? ? ? ? ? ? ? 
Pteranodon_longiceps             0.289 ? 0.486 0.776 ? ? ? ? 0.179 0.138 0.236 0.114 0.415 0.000 ? ? 0.919 0.305 ? ? 0.071 ? ? 1.000 ? ? 0.081 ? ? ? 0.573 0.389 0.280 0.706 0.355 0.263 0.684 0.290 0.298 0.246 0.083 0.618 0.537 0.263 0.473 0.188 0.472 0.107 0.457 0.016 0.116 
Pteranodon_sternbergi            0.415 0.985 0.566 0.798 ? ? ? ? 0.095 0.127 0.204 0.033 ? 0.006 ? ? 0.999 0.316 ? ? 0.076 0.162 0.113 ? 0.063 0.005 0.086 ? 0.668 ? 0.633 0.467 0.389 0.780 0.477 0.169 0.666 0.275 0.287 0.270 0.123 0.515 0.574 0.278 0.464 0.187 0.310 ? ? ? ? 
Tethydraco_regalis               ? ? ? ? ? ? ? ? ? ? ? ? ? ? ? ? ? ? ? ? ? ? ? ? ? ? ? ? ? 1.000 ? ? ? ? ? ? ? ? ? ? ? ? ? ? ? ? ? ? ? ? ? 
Alamodactylus_byrdi              ? ? ? ? ? ? ? ? ? ? ? ? ? ? ? ? ? ? ? ? ? ? ? ? ? ? ? ? ? 0.851 ? ? ? ? ? ? ? ? ? ? ? ? ? ? ? ? ? ? ? ? ? 
Nyctosaurus_grandis              ? ? ? ? ? ? ? ? ? ? ? ? ? ? ? ? ? ? ? ? 0.089 ? ? ? ? ? ? ? ? 0.269 0.000 0.389 ? 0.272 0.811 0.375 ? ? ? ? ? ? ? 0.186 ? ? ? ? ? ? ? 
Alcione_elainus                  ? ? ? ? ? ? ? ? ? ? ? ? ? ? ? ? ? ? ? ? ? ? ? ? ? ? 0.128 ? ? 0.222 0.500 0.434 ? 0.479 0.452 ? ? ? ? ? ? ? ? 0.278 ? ? ? ? ? ? ? 
Simurghia_robusta                ? ? ? ? ? ? ? ? ? ? ? ? ? ? ? ? ? ? ? ? ? ? ? ? ? ? ? ? ? 0.168 ? ? ? ? ? ? ? ? ? ? ? ? ? ? ? ? ? ? ? ? ? 
Cretornis_hlavaci                ? ? ? ? ? ? ? ? ? ? ? ? ? ? ? ? ? ? ? ? ? ? ? ? ? ? ? ? ? ? ? ? ? ? ? ? ? ? ? ? ? ? ? ? ? ? ? ? ? ? ? 
Nyctosaurus_gracilis             0.386 0.685 0.513 0.741 ? ? ? ? 0.256 0.214 0.484 0.253 0.143 0.528 ? ? 0.800 0.446 ? ? 0.078 0.140 0.209 0.875 0.008 0.005 0.078 ? 0.351 0.067 0.936 0.412 0.999 1.000 0.487 0.188 1.000 0.273 0.162 0.318 0.021 0.999 0.565 0.212 0.427 0.160 0.371 ? ? ? ? 
Nyctosaurus_nanus                ? ? ? ? ? ? ? ? ? ? ? ? ? ? ? ? ? ? ? ? ? ? 0.150 ? ? ? ? ? 0.206 0.000 ? ? ? ? ? ? ? ? ? ? ? ? ? ? ? ? ? ? ? ? ? 
Nyctosaurus_lamegoi              ? ? ? ? ? ? ? ? ? ? ? ? ? ? ? ? ? ? ? ? ? ? ? ? ? ? ? ? ? 0.323 ? ? ? ? ? ? ? ? ? ? ? ? ? ? ? ? ? ? ? ? ? 
Muzquizopteryx_coahuilensis      0.223 ? ? ? ? ? ? ? ? 0.206 0.915 ? ? ? ? ? ? ? ? ? ? ? ? 0.750 ? ? ? ? ? 0.238 0.591 0.506 0.728 ? ? ? ? ? ? ? 0.036 0.618 ? 0.253 0.464 ? 0.207 ? ? ? ? 
Tupandactylus_navigans           0.127 ? ? 0.267 ? ? ? ? 0.626 0.136 0.240 0.363 0.111 0.082 ? ? ? ? ? ? ? ? ? ? ? ? ? ? ? ? ? ? ? ? ? ? ? ? ? ? ? ? ? ? ? ? ? ? ? ? ? 
Tupandactylus_imperator          0.172 ? ? 0.188 ? ? ? ? 0.994 0.205 0.244 0.000 ? ? ? ? 0.720 0.226 0.737 ? ? ? ? ? ? ? ? ? ? ? ? ? ? ? ? ? ? ? ? ? ? ? ? ? ? ? ? ? ? ? ? 
Bakonydraco_galaczi              ? ? ? ? ? ? ? ? ? ? ? ? ? ? ? ? 0.704 0.410 0.688 ? ? ? ? ? ? ? ? ? ? ? ? ? ? ? ? ? ? ? ? ? ? ? ? ? ? ? ? ? ? ? ? 
Tapejara_wellnhoferi             0.073 0.230 0.304 0.234 ? ? ? ? 0.630 0.119 0.331 0.497 0.000 0.008 ? ? 0.608 0.078 0.540 ? 0.114 0.089 0.107 ? 0.024 0.046 0.241 0.602 0.151 ? 0.602 0.527 0.564 0.414 0.817 0.066 0.550 0.310 0.349 0.371 ? 0.532 0.668 0.391 0.350 0.389 0.407 ? ? ? ? 
Europejara_olcadesorum           ? ? ? ? ? ? ? ? ? ? ? ? ? ? ? ? 0.312 0.193 0.332 ? ? ? ? ? ? ? ? ? ? ? ? ? ? ? ? ? ? ? ? ? ? ? ? ? ? ? ? ? ? ? ? 
Vectidraco_daisymorrisae         ? ? ? ? ? ? ? ? ? ? ? ? ? ? ? ? ? ? ? ? ? ? 0.629 0.125 ? ? ? ? ? ? ? ? ? ? ? ? ? ? ? ? ? 0.515 ? ? ? ? ? ? ? ? ? 
Caiuajara_dobruskii              ? ? ? ? ? ? ? ? ? 0.077 0.269 ? ? 0.000 ? ? 0.496 0.148 0.393 ? 0.047 ? 0.187 0.500 0.013 0.000 ? 0.492 0.576 ? 0.543 0.260 ? 0.538 ? 0.450 0.540 0.377 0.649 0.240 0.178 ? ? 0.282 0.321 ? ? ? ? ? ? 
Huaxiapterus_benxiensis          0.157 ? 0.320 0.362 ? ? ? ? 0.617 0.242 ? 0.358 ? ? ? ? 0.762 0.301 0.801 ? 0.126 ? ? ? ? ? ? ? ? ? 1.000 0.610 0.583 0.703 0.768 0.009 0.802 0.220 0.263 ? ? ? ? 0.877 0.446 ? 0.263 ? ? ? ? 
Huaxiapterus_corallatus          0.185 0.356 0.457 0.329 ? ? ? ? 0.567 0.165 ? ? ? ? ? ? 0.831 0.252 0.999 ? 0.042 0.089 ? ? ? ? 0.216 0.744 0.432 ? 0.659 0.547 0.638 0.632 0.542 0.234 0.613 0.128 0.127 0.154 0.047 ? ? 0.514 0.561 0.152 0.202 0.076 0.551 0.040 0.147 
Eopteranodon_lii                 0.219 0.227 0.630 0.324 ? ? ? ? 0.578 0.144 ? ? ? ? ? ? 0.882 ? ? ? 0.103 0.117 0.189 ? ? ? ? ? 0.227 ? 0.671 0.661 0.643 0.491 0.560 0.256 0.567 0.252 0.229 0.291 ? 0.831 0.682 0.412 ? ? ? ? ? ? ? 
Huaxiapterus_jii                 0.201 0.387 0.557 0.102 ? ? ? ? 0.718 0.151 ? ? ? ? ? ? 0.441 0.273 0.994 ? 0.160 0.178 0.262 ? ? ? ? 0.390 0.468 ? 0.660 0.594 0.597 0.538 0.642 0.276 0.573 0.264 0.273 0.229 0.006 ? ? 0.475 0.475 0.234 0.295 ? ? ? ? 
Sinopterus_dongi                 0.166 0.657 0.214 0.158 ? ? ? ? 0.999 0.240 0.311 ? ? ? ? ? 0.732 0.232 0.721 ? 0.096 0.158 0.242 0.375 ? ? 0.163 0.737 0.503 ? 0.639 0.566 0.563 0.505 0.776 0.092 0.557 0.242 0.232 0.193 0.145 ? 0.680 0.445 0.479 0.061 0.220 0.078 0.187 0.038 0.131 
Bennettazhia_oregonensis         ? ? ? ? ? ? ? ? ? ? ? ? ? ? ? ? ? ? ? ? ? ? 0.163 ? ? ? ? ? 0.449 ? ? ? ? ? ? ? ? ? ? ? ? ? ? ? ? ? ? ? ? ? ? 
Dsungaripterus_weii              0.238 0.701 0.335 0.430 ? ? ? ? 0.351 0.137 0.534 0.344 0.033 0.385 0.420 0.032 0.575 0.220 ? 0.672 0.021 0.157 0.220 0.625 0.020 0.186 0.342 ? 0.357 ? 0.757 0.557 ? 0.600 0.747 0.305 0.675 0.249 0.497 0.504 ? 0.294 ? 0.604 0.609 ? 0.112 ? ? ? ? 
Domeykodactylus_ceciliae         ? ? ? ? ? ? ? ? ? ? ? ? ? ? ? 0.052 ? ? ? ? ? ? ? ? ? ? ? ? ? ? ? ? ? ? ? ? ? ? ? ? ? ? ? ? ? ? ? ? ? ? ? 
Noripterus_parvus                0.185 ? 0.453 0.515 ? ? ? ? 0.382 0.129 0.470 0.291 ? 0.248 0.570 0.040 0.761 0.377 ? 0.261 0.031 0.071 0.553 ? ? ? ? ? 0.179 ? 0.607 0.568 0.646 0.623 0.589 0.303 0.573 0.330 0.369 0.430 ? 0.395 ? 0.472 0.563 0.173 ? ? ? ? ? 
Noripterus_complicidens          ? ? ? ? ? ? ? ? ? ? ? ? ? ? ? 0.016 ? ? ? ? 0.145 0.143 0.716 0.625 0.030 0.196 ? ? 0.400 ? 0.573 0.666 ? 0.606 0.313 0.302 0.643 0.196 ? ? 0.199 0.618 0.264 0.384 0.832 0.075 0.202 0.045 0.361 0.184 0.619 
Tupuxuara_longicristatus         0.138 ? ? ? ? ? ? ? ? ? ? ? ? ? ? ? ? ? ? ? ? ? ? ? ? ? ? ? ? ? ? ? ? ? ? ? ? ? ? ? ? ? ? ? ? ? ? ? ? ? ? 
Tupuxuara_leonardii              0.425 0.999 0.216 0.257 ? ? ? ? 0.515 0.213 0.123 0.028 0.174 0.342 ? ? 0.894 0.368 ? ? 0.053 0.147 0.189 ? ? ? 0.222 ? 0.364 ? 0.487 0.408 0.610 0.506 0.773 0.248 0.613 0.101 0.121 ? ? ? ? 0.478 0.416 0.226 0.254 ? 0.423 0.032 0.108 
Alanqa_saharica                  0.813 ? ? ? ? ? ? ? ? ? ? ? ? ? ? ? ? ? ? ? ? ? ? ? ? ? ? ? ? ? ? ? ? ? ? ? ? ? ? ? ? ? ? ? ? ? ? ? ? ? ? 
Aerotitan_sudamericanus          0.560 ? ? ? ? ? ? ? ? ? ? ? ? ? ? ? ? ? ? ? ? ? ? ? ? ? ? ? ? ? ? ? ? ? ? ? ? ? ? ? ? ? ? ? ? ? ? ? ? ? ? 
Thalassodromeus_sethi            0.149 ? 0.522 0.431 ? ? ? ? 0.664 0.149 0.007 0.081 ? ? ? ? ? 0.225 ? ? ? ? ? ? ? ? ? ? ? ? ? ? ? ? ? ? ? ? ? ? ? ? ? ? ? ? ? ? ? ? ? 
Chaoyangopterus_zhangi           0.225 ? ? ? ? ? ? ? ? ? ? ? ? ? ? ? 0.647 0.567 ? ? 0.182 0.233 0.216 ? ? ? 0.195 0.000 0.487 ? 0.573 0.529 ? 0.640 0.510 0.121 0.609 0.145 0.101 0.194 ? 0.404 0.347 0.604 0.599 0.286 0.297 ? 0.179 ? ? 
Jidapterus_edentus               0.135 0.578 0.531 0.573 ? ? ? ? 0.547 0.107 ? ? ? ? ? ? 0.811 0.398 ? ? 0.106 0.187 0.297 ? ? ? 0.198 ? 0.437 ? 0.620 0.400 0.751 0.621 0.473 0.296 0.598 0.191 0.143 0.172 ? 0.605 ? 0.472 0.544 0.319 0.297 0.098 0.423 0.061 0.135 
Eoazhdarcho_liaoxiensis          ? ? ? ? ? ? ? ? ? ? ? ? ? ? ? ? 0.616 0.604 ? ? 0.167 0.175 0.244 ? ? ? 0.197 0.897 0.512 ? 0.563 0.000 0.499 0.478 0.463 0.226 0.554 0.260 0.229 0.231 ? ? ? 0.309 0.718 ? ? ? ? ? ? 
Shenzhoupterus_chaoyangensis     0.090 ? 0.000 0.552 ? ? ? ? 0.856 0.141 0.000 ? ? ? ? ? 0.704 0.228 ? ? 0.163 ? ? ? ? ? 0.129 ? ? ? 0.745 ? ? 0.694 ? 0.222 0.626 0.165 0.172 0.198 ? ? ? 0.682 0.436 ? 0.385 ? ? ? ? 
Radiodactylus_langstoni          ? ? ? ? ? ? ? ? ? ? ? ? ? ? ? ? ? ? ? ? ? ? ? ? ? ? ? ? ? ? ? ? ? ? ? ? ? ? ? ? ? ? ? ? ? ? ? ? ? ? ? 
Microtuban_altivolans            ? ? ? ? ? ? ? ? ? ? ? ? ? ? ? ? ? ? ? ? ? ? ? ? ? ? 0.269 0.226 0.206 ? 0.569 0.416 ? 0.585 0.843 0.092 0.560 0.322 0.179 0.000 ? ? ? ? ? ? ? ? ? ? ? 
Aralazhdarcho_bestobensis        ? ? ? ? ? ? ? ? ? ? ? ? ? ? ? ? ? ? ? ? ? ? ? ? ? ? ? ? ? ? ? ? ? ? ? ? ? ? ? ? ? ? ? ? ? ? ? ? ? ? ? 
Volgadraco_bogolubovi            ? ? ? ? ? ? ? ? ? ? ? ? ? ? ? ? ? ? ? ? 0.093 0.193 0.027 ? ? ? ? ? ? ? ? ? ? ? ? ? ? ? ? ? ? ? ? ? ? ? ? ? ? ? ? 
Eurazhdarcho_langendorfensis     ? ? ? ? ? ? ? ? ? ? ? ? ? ? ? ? ? ? ? ? 0.355 ? ? ? ? ? ? ? ? ? ? ? ? ? ? 0.009 ? ? ? ? ? ? ? ? ? ? ? ? ? ? ? 
Montanazhdarcho_minor            ? ? ? ? ? ? ? ? ? ? ? ? ? ? ? ? ? ? ? ? 0.256 ? ? ? ? ? ? 0.999 ? ? 0.793 0.439 ? 0.461 0.526 0.652 ? ? ? ? ? ? ? ? ? ? ? ? ? ? ? 
Phosphatodraco_mauritanicus      ? ? ? ? ? ? ? ? ? ? ? ? ? ? ? ? ? ? ? ? 0.351 ? ? ? ? ? ? ? ? ? ? ? ? ? ? ? ? ? ? ? ? ? ? ? ? ? ? ? ? ? ? 
Zhejiangopterus_linhaiensis      0.346 ? 0.499 0.487 ? ? ? ? 0.457 0.206 0.401 0.157 ? ? ? ? 0.806 0.430 ? ? 0.544 0.506 0.412 0.625 ? 0.001 0.236 ? 0.564 ? 0.694 0.513 0.763 0.678 0.999 0.093 0.543 0.260 ? ? ? ? ? 0.600 0.618 0.000 0.265 0.132 0.476 0.066 0.121 
Azhdarcho_lancicollis            0.422 ? ? ? ? ? ? ? ? ? ? ? ? ? ? ? ? ? ? ? 0.284 ? 0.236 ? ? ? ? ? ? ? ? ? ? ? ? ? ? ? ? ? ? ? ? ? ? ? ? ? ? ? ? 
OCP_DEK_GE_716                   ? ? ? ? ? ? ? ? ? ? ? ? ? ? ? ? ? ? ? ? 0.461 ? ? ? ? ? ? ? ? ? ? ? ? ? ? ? ? ? ? ? ? ? ? ? ? ? ? ? ? ? ? 
Hatzegopteryx_thambema           ? ? ? ? ? ? ? ? ? ? ? ? ? ? ? ? ? ? ? ? ? ? ? ? ? ? ? ? ? ? ? ? ? ? ? ? ? ? ? ? ? ? ? ? ? ? ? ? ? ? ? 
Arambourgiania_philadelphiae     ? ? ? ? ? ? ? ? ? ? ? ? ? ? ? ? ? ? ? ? 1.000 ? ? ? ? ? ? ? ? ? ? ? ? ? ? ? ? ? ? ? ? ? ? ? ? ? ? ? ? ? ? 
Quetzalcoatlus_spp               0.525 ? ? ? ? ? ? ? ? 0.301 ? ? 0.189 ? ? ? 0.740 0.572 ? ? 0.789 1.000 0.109 ? ? ? 0.199 0.934 ? ? 0.621 0.296 0.673 0.755 0.521 0.285 0.633 0.000 0.000 ? 0.138 ? ? ? 0.292 0.009 ? ? ? ? ? 
Epapatelo_otyikokolo             ? ? ? ? ? ? ? ? ? ? ? ? ? ? ? ? ? ? ? ? ? ? ? ? ? ? ? ? ? ? 0.520 ? ? ? ? ? ? ? ? ? ? ? ? ? ? ? ? ? ? ? ? 
&[num] 
Euparkeria_capensis              0?100?000000010000000?000000000???????00000000100??0000?0000000?0000000000000000??00000010000?000000000000?00100??0010?010000000001000110000000000000000000000000000000000000000000000000?0????00000???000??0000000000000010 
Ornithosuchus_longidens          0?1?0?00000001?000000?2001001?0???????000000000?0??1010?0000000?000000000???0?????0?0?0010000?000000???????00100??0010?00000000000100011000?000000000[01]00?00000000000101000000000001000?00??????000??0??000??0000000000001?0? 
Herrerasaurus_ischigualastensis  0?1?0?000000010000100?000000000???????00002000000??1000?0000000?00000000000000????0?0?0010000?00000000?????00200??0010?0000000000010001100000000000?0000100000000?????????000010001010000?0????00110000000??0000001000000030 
Scleromochlus_taylori            1??00?000010?1??01000?00?0?0100???????010000000?0??1??0?0?020???10???001?0000?????00??0?10000?00?00000?????00120??0010???0000?????1???1???00???10000??0000000000000????????0?01???1000?????????01??????000??00000001?00?004? 
Eudimorphodon_ranzii             1?100?000010?10101000?001110200???????01003000000??1000?0002100?100000010???0?00??01??00200010000000010000?00110??0001011002011001104211010?10???000?00?1???0?00002010110100011000101000??0??1000010??????00??000?01?0?00??? 
Eudimorphodon_rosenfeldi         1?1?0?00001??10101000?001110200???????01003000000??1?00?0002100?10000?01000100????????0010001000000001?????00110??0001010002011001104211010?10?000000?0???0000?00010101001??01100?101000000?00000010000000??00?00?01???0?020 
Eudimorphodon_cromptonellus      ???????00??00?0??100??????????????????010?200?00?????0??0????0???0???0?????????????????01000??000?00???????????0???00101000?01100[01]1042?10????0???0?????0???00?00?0101?0001?0?11?001010????0????0?010??0????????????100000?20 
Peteinosaurus_zambellii          ?????????????????????????????????????????????????????????????0????????????????????????00??000?0???0000?????0??????000101000201?0002022??000????????????????????0????????????????????????????????0010000000??00000?0????????0 
Caviramus_schesaplanensis        ????0????????????1?????????????????????????????????????????????????????????????????????010001111100000?????00020??00???100010??0?[01]1032??010????????????????????????????????????????????????????????????????????????????????? 
Raeticodactylus_filisurensis     1?1?0?00001??10101100?00?010201010100001002000000???000?0002000?100000010???0?????01???012001111100000?????00021??0001211001010001103211010?10?0000???00????????0?????????00?11???1010000????0?000??0?0????????????1000?0??0 
Austriadactylus_cristatus        1?1?0??00010?101?1000?00?0001?1010200001001001000??1000?00?1000??00000??0??10?????0?????20000?000?0000?????00120??0001[01]11002010000101111000????00000000???000000?01????001???11????01000??????00001???0?00????000?01???????? 
Preondactylus_buffarinii         1?1?0?00001??10101000??0???0100???????01001001000????0?????1000?10000??1???????????????010000?00000000?????00110???00101?0020100001011110000????0?00???0???000?0?01??????????11????01000?????00000100?00000000000001?00?0020 
Dimorphodon_macronyx             1?1?0?00001??00111000?203000210???????01111001000??110??0001000?10000001???10?????01???012000?000000000000?20132001001?4100211000011??11000011???000??0010020?00012????00?00011100102000??0002000010000101130010010100000020 
Parapsicephalus_purdoni          ???0???01010000111000?203000210???????01112001000??1000?0001000?1000000100010000??01000????????????????????????????0??????0?1????[01]1???????0????????????????????????????????????????????????????????????????????????????????? 
Campylognathoides_liasicus       1?100?000010010111000?002110210???????02102000000??1000?0002000?0001000000010000??01??0122000?0000001?0000?10130??1000?0000211100011??10010010?000000000000200000021110001001111??101000001?020000100011011310?00?0101100021 
Campylognathoides_zitteli        1?1?0?000010?10111000?00???0210???????02102000000??1000?00??000?000100?0????0?0???????0122000?0000001?000??10130??1000?0000211100011??10010????00000??0000020?00002?110001?01111??1010??001??2000010?011011310100101011?0021 
Sericipterus_wucaiwanensis       311?10101010111111101??????0?11001?001011?20000?0?????0?0?02001?1?00??11?0??00?0??????11??????1001001?0000?00?31??1020?2211220111121??00??0?1000000????0??????00?02???????000111?010300100???????????02201?????????????????? 
Angustinaripterus_longicephalus  311?10101010111111101?0021102?1001?00101102000000??1?0??0002101?10000011??????????01???112010?1001011????0?00131??1020?2211120111121??000?0????????????????????????????????????????????????????????????????????????????????? 
Harpactognathus_gentryii         3010101012101111?110???????0??1001?001001?200?0???????????????????????????????00??01???1???????????????????????????020????1220???[01]2???00??0????????????????????????????????????????????????????????????????????????????????? 
Cacibupteryx_caribensis          ??10???01010111110101?002000?10???????00102000000??0000?0001001??000000?00010000??0100?1???????????????????????????020????0?2????[01]2????00?0???????????????????????????????????????????????0????????????????????????????????? 
Rhamphorhynchus_muensteri        2?100?000010111110101?002110210???????00102000000??0000?0012201?100000?100010000??01001102000?1000001?0000?01131??1020?2210220110221??00010011000000000010020000002110100[12]000111001060000100020010101012011[12]011001010110012[12] 
Qinglongopterus_guoi             3?1?0??0?0?01?1??1101?002?1?2??????????0??20000?????????0??200???00?00???001??????0????11200??1?0?0?1??????0?130??1020?20112201111?1??0001??10???000?00?1?020000002????00????111??103000?00??3?0101?100?011101?????1?1100121 
Nesodactylus_hesperius           ??????????????????????????0????????????????????????????????1?0???????????????????????????????????????????????????????????????????????????????1?0000???????020?00?02?11000200?111??1060000100??001010?01???00?100010??1?????? 
Dorygnathus_banthensis           1?100?000010111111101?002110210???????00102000000??1000?0002001?1000000100010000??0100111200101000001?0200?00131??1020?2010220110111??10010010?000000000100200000021101003001111001030000100030010101002011[13]0110010101100122 
Scaphognathus_crassirostris      1?1?0?000010210111100?002110210???????01102000000??1000?0002001?100000010??10?????01?00112000?1000001??????00131??1020?2010220100011??100000??00000000000002000000211??002000110??1030000100020010101002?11101[01]0000101100122 
Sordes_pilosus                   1?100?000010110111000?002110210???????01102001000??1000?0012101?100010?100010000??01?00110000?1000001?0001010130??1020?3000220100011??10000011?00000000010020000002?110004001111??1000000000?[45]001010100201110110000101100122 
Darwinopterus_modularis          1?100?00001011?11??100004110?1111220000????001010??1000?00121010100110?11??10?010001???110000?1000001??????10100??1020?3000220101031??200001???10100?00?1?020000002?1??00200?110???12000????04?010??0?02011311000001?1100122 
Wukongopterus_lii                1?1?0?00001011?1???1?0?????0??????????0????????????????????2???01??????1??????????01???110000?1000001??????10100??1020?3000220101031??20000??0?10?00100010020000002????002??0110??1???????0??4?010100???????01?00001?11?0122 
Pterorhynchus_wellnhoferi        1?100?00001011?11??100004110??110110000????001000????00?00?22010100010?100010??????????110000?1000001??????10100??1020?3000220101011??100001?0???00????0100200?0?????????????110??102000?????0001010??0201??01000101???0??2? 
Changchengopterus_pani           ?????????????????????????????????????????????????????????????????????????????????????????????????????????????????????????????????????????????0?100001?0???010?00?02????00?00?111???00000?????400101??00201??01?0???1?11?1121 
Batrachognathus_volans           1?1?0?0001?020?0???100000111?10???????0????0????0??1?00?00?001?0?00110??????0?????10?1011010??0020001?0000?1?220??1010?3000220100011??10000??????001??00??????000020100004000110??1000000??????010101??????1?0100?01?1??00?? 
Jeholopterus_ningchengensis      1?1?0?0001?020?0???100000111?10???????0????0????0??1000?00?001?0?001?0??????0?????10?1?110100??02000????00?1?22????010?3000220100011??10000????10??1100??0100000002????00??001110?10400000???5001010100??11100100?01?11?0020 
Anurognathus_ammoni              1?1?0?00011020?0???1000001?1?10???????0????0???00??1000?00?001?0?00110??????00????10?10110100?0020001?0000?1?220??1010?3000220100011??100001???????1?00010100000002????????00111??104000??0??50010101??101??00100?0101100020 
Dendrorhynchoides_curvidentatus  1?1?0?0001?020?0?????0?????1??0???????0?????????????????????01???????????001??????10?10?10100?002000??0?00?1???0???010?300022?100011?????00????10??1??0???100000002????004?001110?100000??0??500101?1?01????00?00??1???0?021 
Kryptodrakon_progenitor          ?????????????????????????????????????????????????????????????????????????????????????????????????????????????????????????????????????????????????????????0????????2???????00??1????0??????000?10?000?00????????????????????? 
Gnathosaurus_subulatus           1?10110002101??11??110004110?1110310000????001000??1000?11132010100010?121100??0??0101?110210?100?001??????1???0??1020?2011120?01231??100?0????????????????????????????????????????????????????????????????????????????????? 
Gnathosaurus_macrurus            ?????10?0??01???????????????????????????????????????????????????????????????????????????10210?10??001?1000?10?2????020????1120???23?????00??01?22101???????????????????????????????????????????????????????????????????????? 
Plataleorhynchus_streptophorodon 1?10100002?01??1???1??????????????????????????????????????1???????????????????10??0?????1??????????????????????????02?????1120???13???10000????????????????????????????????????????????????????????????????????????????????? 
Huanhepterus_quingyangensis      1?1?100000101?????????????????1103?000?????????????????????????????????????????????????110010?100000???????????0???020?2010120101131??10000????22?0110001??0???0??2??????1?0?1?1??1050?????????0?1????????1301001?01?1??0??? 
Moganopterus_zhuiana             1?100?00001??2?11??101004110?11101000?0????001100??0?01311?3201??0?0?0??2?100???????????12000?1000001??????00020??1020?2010120111111??10000????221?????????????????????????????????????????????????????????????????????????? 
Elanodactylus_prolatus           ???????????????????????????????????????????????????????????????????????????????????????????????????????????????????????????????????????????????221011000?????000002?101001?01111?0105000000?040011000?0301130100110?011?0133 
Kepodactylus_insperatus          ????????????????????????????????????????????????????????????????????????????????????????????????????????????????????????????????????????????01012101??????????????????????001111?0105000??0??????100??0?????0??????1???????? 
Ctenochasma_elegans              1?100?00000112?11??100004110?1[01]103?0000????001200??1100?11132010100010?12??00?10??0?0??110000?1000001?1000?00120??1010?2011110101211??10000?0??1010010001??00000002??00002000111??105000000??4??1100?0?3011301001?0101100133 
Pterodaustro_guinazui            1?000?00001112?11??100004110?10???????0????001200??1100?1113101?100000?12??00?10??0????100000?1000001?100??20020??1010?2010200201001??00000?0101010?10??110000000021100002000?110?1050??000004???1000003??13010011010111?133 
Beipiaopterus_chenianus          ???????????????????????????????????????????????????????????????????????????????????????????????????????????????????????????????????????????????1010?100?1?100?00022????00?00?11???1050???0???4???10000?????????????1?????133 
Gegepterus_changae               ??0????0001112?11??10000?110?11??300000????001200??1100?1?131010100000?12???0?10??0????10?????00??001???0??00020??1010?2010?1?101201???0??0001?10100?????????????22????002?????????????????????[01]???0?003????0??????1???0???? 
Feilongus_youngi                 1?100?000010?2?11??101?04110?1110100000????001000??010101113?010100010?12?100?10??0???0112000?1000001??????00020??1020?2010120111111??10000????22101???????????????????????????????????????????????????????????????????????? 
Cycnorhamphus_suevicus           1?000?10021012?11??100002110?1[01]12220000????001100??1101111132010100010?1211?0?10??01010100200?1001001????0?01111??10???20101??100011??1??00000000001?0??1??00000?02?110002000111??108000000??4?01100000301130100000101100133 
Ardeadactylus_longicollum        1?101000001012?11??110004110?10???????0????001?00??1100?110320101000101121?00?10??01010110010?1??0001?1001010120??1020?5010120101131??1000000102210110001??00000002??0100110?0110?105000000??4?01100?0?3011301001101011001?? 
Pterodactylus_antiquus           1?100?00001011?11??100004110?10???????0????001100??1100?11132010100010?12???0?10??0????110000?1000001?0?00?00130??1020?3000120100011??10000000?10001100010100000002010100400011100105000000004001100100301130100110101100133 
Normannognathus_wellnhoferi      1?000?000?10?2?1??????????????1122?000????????????????????????????????????????10???????1?0200?1?0000??100??????????020?2010110100?11??11000????????????????????????????????????????????????????????????????????????????????? 
Germanodactylus_cristatus        2?100?00001011?11??100004110?1110320000????001100??1100?20132010100010?11???0?1????????111000?1000001?0?0??10130??1020?3000120100011??010100?????001100010??0000002????0020001110?1050??000??4??110010?301130100010101100133 
Germanodactylus_rhamphastinus    2?100?00001011?11??100004110?1110320000????001100??1100?20132010100010?11???0?1????????111000??000001?0?0??10130??1020?3000120100011??110000???10001??0?10???0000?20?00002?0?111??1?????0?00?4??1?0010?301130?000?01011001?? 
Haopterus_gracilis               1?100?00001011?1???1?000??10??0???????0????010000???000?0?1230??1????0?1????0?0????????112000?1?0?0?1??????10100???020?3000220100011??10000??????001?00??????1000020101??2000011???07100?????4?01?00100??????????????????1?? 
Aetodactylus_halli               ?????000?2?10?????????????????0????????????????????????????????????????????????100????1110210?1020001?1000?1?101??1010?51?0120101131????001????????????????????????????????????????????????????????????????????????????????? 
Anhanguera_santanae              1?101000101001?10??110102110?111040?110????011011021111000123011101010?11110010100011111100?0?1000001?1010?00102?11021251?0121111131??1010110110110101001010?111002????11?00100???20711000011401?1????0211??1110100?011????? 
Anhanguera_piscator              1?1?1000101001?10??110102110?1110400110????011011021111000123011101010?11110010????1??1110010?1000001????0?0010201102125110121111131??10101101101101010010101?110020010112001001012071100?0114?1?101110211???110110101101?4? 
Anhanguera_blittersdorffi        1?101000101001?10??110102110?1110400110????1????1021111000123011101010?1111001010001111110010?100?0?1?10????01?201?02125110121111131??10101????????????????????????????????????????????????????????????????????????????????? 
Anhanguera_araripensis           1?1010?0101001?10??110102110?1110400110?????????1021111000123011101010?11110010100011111??0???10??001????0?0010???102125??0121111131??101?1???????????????????????????????0010010120?110?00114?1?1?????????????????????????? 
Liaoningopterus_gui              1?1010001010?1?10??1101[02]2110??110400110??????????????1??0012301?101010?1???????100????11100?0??00?001??????00102???02125110121101131??10101?01???101???????????????????????????????????????????????????????????????????????? 
Siroccopteryx_moroccensis        0?101100?0?00?????????????????1004?01??????????????????????????????????????????101?????1???????????????????????????02?25?0012??01131??2?0??????????????????????????????????????????????????????????????????????????????????? 
Tropeognathus_mesembrinus        1?101000101001?10??110102110??100400110????1????1021111000123011101010?1111001010001111110010?1000001?1000?0013201?021251?0121101131??10001????????????????????????????????????????????????????????????????????????????????? 
Coloborhynchus_clavirostris      0?11120??0????????????????????1004?011?????????????????????????????????????????101?????1???????????????????????????02?25??0121???13???2?0??????????????????????????????????????????????????????????????????????????????????? 
Coloborhynchus_wadleighi         0?11120??0100?????????????????1004?011?????????????????????????????????????????101?????1???????????????????????????02?25??0121??1131??2?0??????????????????????????????????????????????????????????????????????????????????? 
Ornithocheirus_simus             0?10100??0????????????????????1004?011?????????????????????????????????????????101?????1???????????????????????????02?25??01?????03???1????????????????????????????????????????????????????????????????????????????????????? 
Brasileodactylus_araripensis     ?????0?????00??????????????????????????????????????????????????????????????????????????110010?1000001?101??????1???021250?0121?01131????001????????????????????????????????????????????????????????????????????????????????? 
Ludodactylus_sibbicki            1?101000101??1?10??110102110?10???????0????011011111111200122011101000?111100?0101010?1110010?1000011?100??101000?102125110121101131??10001????????????????????????????????????????????????????????????????????????????????? 
Boreopterus_cuiae                1?1?0?10101??1?1???11010?110?10???????0?????????10211?100012201?100010?11??????????????112000?1001011??????0010[01]??1000?2010220100111??10000????01101??????10?????0??????????10?????????????????11???1?0????????????1?11?114? 
Guidraco_venator                 1?1?1000101??1?10??110102110?10???????0?????????1211111200122011100000?11???0?????0?0?111?010?1000011??????10100??102125110121101111??10001?01???101???????????????????????????????????????????????????????????????????????? 
Zhenyuanopterus_longiristris     1?1?0?00101??1?11??110104110?1112310??0????011001021101000122010100010?11???0???????0??11?000?1000011??????0010[01]??1000?2010220100011??10000??1?01101?1111?10?111102??????2?0?001??207110?????4??110?1???????0??????1?11?114? 
Cearadactylus_atrox              1?101000101001?10??11010?110??1?0100110????01100?????????012301010101??1??????010001111110010?1000001?1010?10101??102125010121101131??10001????????????????????????????????????????????????????????????????????????????????? 
Hongshanopterus_lacustris        2?100?1010?01??????110?0?110??????????0????01000????????0?1?[23]0??1?001??11110??010001?111???????????????????????????020?0000220?01031??100?0101?01101???????????????????????????????????????????????????????????????????????? 
Lonchodectes_compressirostris    ??10???0131011???????0????????0??????????????????????????????0????????????????0100?????11?30???????????00??????1???000????0?10???03????0000????????????????????????????????????????????????????????????????????????????????? 
Lonchodraco_giganteus            1?1?0?00?01011?????1?0?????0??1105?011?????????????????????????????????????????1000????110000?10000???1?1??????200?00125000210101031??10000??????????????????1????2????????0???1??2071?????????????????????????????????????? 
Cimoliopterus_cuvieri            1?101000?011?1????????????????1104?011?????????????????????????????????????????100?????1???????????????????????????020?5100120?01131??120?1????????????????????????????????????????????????????????????????????????????????? 
Cimoliopterus_dunni              1?101000?011?1????????????????1104?011?????????????????????????????????????????100?????1???????????????????????????020?5??0120?01131??120?1????????????????????????????????????????????????????????????????????????????????? 
Nurhachius_ignaciobritoi         1?1?0?00001011?10??10010?110?10???????0????010000??1110?0013301?100110?11???0??1110?0?0112000?1000001?1000?101[02]0??1020?4000110101011??10001101?01101??1???????11?021?1010200?0010??0711010?1?4?1?10011?3??????001101?1?01?4? 
Liaoxipterus_brachyognathus      ???????????11???????????????????????????????????????????????????????????????????????????1?200?10??0?1????0?1012????020?4000000?01011????00?????????????????????????????????????????????????????????????????????????????????? 
Istiodactylus_sinensis           1?1?0?000211?1?10??100012110?10???????0????1????0??1?10?00134011100121?11???0??1110?0?0112?00?1000001??????10120??1020?4300000101011??100011???01?01??1????????1?02????00??00001???071???00???01??00??0311?????????1?1?0???? 
Istiodactylus_latidens           1?1?0?00021111?10??100012110??0???????0????1????0??1110?0013401?100121?11????10?????0?0112200?1000001????0?10120??1020?4300000101011??10001????0?10??111?????111102101010?00?00101207110100114???100?1?311?????????111101??? 
Pteranodon_longiceps             2?000?00101002??0??110104110?10???????0????010?01200101200124011101010?111100100??01011111000?1100011?0001100101??11??????????????????????010110110101111110111010200101011000001030711000011402110011010112011011011110114? 
Pteranodon_sternbergi            2?0?0??0101002??0??110104110?10???????0????0100?1200101200123011101010?11??00???????0??111000?110?011??????00101???1??????????????????????????????0?????11??1?????20?10101?0?0?01?3?7????0?1?20??100??0????????????1???01??? 
Tethydraco_regalis               ???????????????????????????????????????????????????????????????????????????????????????????????????????????????????????????????????????????????????????????????????????????0?00110307110???????????????????????????????????? 
Alamodactylus_byrdi              ??????????????????????????????????????????????????????????????????????????????????????????????????????????????????????????????????????????????????????????????????????????1000010?306110??????????00???????????????????????? 
Nyctosaurus_grandis              ???????????????????????????????????????????????????????????????????????????????????????????????????11????????10??????????????????????????????????101??????????????2???????10001???31601000?????????????????????????1111?1??? 
Alcione_elainus                  ?????????????????????????????????????????????????????????????????????????????????????????????????????????????????????????????????????????????????????????????110?02?01110?0000000031601000???????100?10????????????111101??? 
Simurghia_robusta                ?????????????????????????????????????????????????????????????????????????????????????????????????????????????????????????????????????????????????????????????????????????????00?????60?0???????????????????????????????????? 
Cretornis_hlavaci                ??????????????????????????????????????????????????????????????????????????????????????????????????????????????????????????????????????????????????????????????????????????1000010031?110??0????2??00??0????????????????????? 
Nyctosaurus_gracilis             2?100?10101001??0??110002110?10???????0????1????1201101100123011100010?111100?00??01?11111000?1101011?0001001101??11??????????????????????0100103101011111101110002001110110001100316010000111?21100?102011201101101111011?? 
Nyctosaurus_nanus                ???????????????????????????????????????????????????????????????????????????????????????1???????????11??????0?10???1???????????????????????????????????1??????????02????10?10001?00?16010???????????????????????????????????? 
Nyctosaurus_lamegoi              ?????????????????????????????????????????????????????????????????????????????????????????????????????????????????????????????????????????????????????????????????????????????01????160?????????????????????????????????????? 
Muzquizopteryx_coahuilensis      ????????1?1????????110002110?10???????0????1???00??110110012201?100010?11???0??????????1???????????11??????0103???11??????????????????????01???03?01??111?10?11000??0?1??1?0?001???16010?????102?1????????120?101??1?11?114? 
Tupandactylus_navigans           2?210?110010?0??1??100124110?1111011100????00110???010?000123010100110?11??0??0?????1??????????????????????????????1??????????????????????0????????????????????????????????????????????????????????????????????????????????? 
Tupandactylus_imperator          2?2?0?1?0010?0?????1?0123110?1111011100????1????1120?01300123010100110?11???1?0????????122001010????1?010??001?210?1??????????????????????0????????????????????????????????????????????????????????????????????????????????? 
Bakonydraco_galaczi              ???????????00?????????????????????????????????????????????????????????????????????????112100111001111?01010001020111???????????????????????????????????????????????????????????????????????????????????????????????????????? 
Tapejara_wellnhoferi             2?210?11001000??1??100124110?1111010110????001101120101300123010100110?111101110??0101012100111001111?01010001021001??????????????????????0?011001010100????01001221110001101011001080111110041??100010311??00111?111111014? 
Europejara_olcadesorum           ????????0??0???????1????411???????????0?????????????1???00?2?0?010???0?1??????1???010?0121001110?1111?01????010210?1??????????????????????0????????????????????????????????????????????????????????????????????????????????? 
Vectidraco_daisymorrisae         ????????????????????????????????????????????????????????????????????????????????????????????????????????????????????????????????????????????????????????10?????????????????????????????????????????????311???011111????????? 
Caiuajara_dobruskii              2?210?11001000?????100124110??111011110?????????112???13?01?[34]0?0100110?11?101?00??0???012200111001011?010??001021001??????????????????????0??110010???0?1?100100122?1?00?21?101???108011??1004???100?102??12??111?1111110??? 
Huaxiapterus_benxiensis          2?2?0?1?0010?0?????100????10?1112610110????0?10?1120?013?0133010100110?11??????????????12100101001111?010??2012201?1??????????????????????0?01???101??0??????????????????????01????080??????0??2110?110????????????1??????4? 
Huaxiapterus_corallatus          2?2?0?110010?0?????1?0?2???0?1112610110????????????0??10???????01??????1????1??????????12100101001?11??????20?220111??????????????????????0?01???101??0???????00?22??1000????01????0801?111??4?2110?110???13???11?111?1??14? 
Eopteranodon_lii                 2?210?11001000?????100?????0??110410110???????????????????1??0?01?011??11?????????????1?21001010??1?1?00?????1????11??????????????????????0????00101???????????0?22????00??0?01???10801??1???4?????0??02011301111111?1110??? 
Huaxiapterus_jii                 2?210?1??010?0?????100??4110??110410?10????00?10???????0??13?01?1?011??1???????0??0????1210010100???1?00???201220111??????????????????????0???????01??0???1??????22??1000210?01???108011?????411110?110???13???????1?1110??? 
Sinopterus_dongi                 2?2?0?110010?0??1??10002?1?0?1110410110????0011011201?130?133?101?011??11???1??????????12100101001?11??????201220111??????????????????????0????00101??0??110?1?0?22?11000210?011??108011111004121100110?0?13?1111111???1?14? 
Bennettazhia_oregonensis         ??????????????????????????????????????????????????????????????????????????????????????????????????????????????????????????????????????????????????????10??????????????????10100100108011???????????????????????????????????? 
Dsungaripterus_weii              30000?10001001?11??100012110?1112330101????1????1120001220122010110110?1111011010001011101000?1001001?1001000101??1020?1000220101041??020101011001010111111001001121110001???0?0??108011111?0?10?1001123?1????1111?001210??? 
Domeykodactylus_ceciliae         ???????????0???????????????0??1?2???10?????????????????????????????????????????????????11?0???10??001????10?0??1???020?1??0220???04?????01?????????????????????????????????????????????????????????????????????????????????? 
Noripterus_parvus                30100?10001001?11??100012010?1111330101????1????112000122012201?110110?111101?0100010?1111000?1001001?1001100101??1020?1000220101031??010101011001010111??????00?12????00?000011001080111110041?1100?02??1?????????001210??? 
Noripterus_complicidens          ???????????00??????????????????????????????????????????????????????????????????????????1??000?100?00??100110???1???020?10?0220??1?31????????01100101??1?11100????12????00?0010111010801111100??01100?0210113?111111001210?4? 
Tupuxuara_longicristatus         ???00?100010???????100?????0?11005?012????????????????????1????0??0???????????11110????????????????????????????????1??????????????????????0???????0?????????????????????0??????????????????????21?0??1?????????????????????? 
Tupuxuara_leonardii              2?100?10001001??1??100124110?1100530120????1????1100001220123010100110?1111011111101111111000?1001011?0001000101??11??????????????????????0101100101??11??????001121?10001100??11?108011111004???100110????????????1112101?? 
Alanqa_saharica                  2?100?10?31??1????????????????????????????????????????????????????????????????01?1?????01??00?1??101??101??????????1??????????????????????0????????????????????????????????????????????????????????????????????????????????? 
Aerotitan_sudamericanus          2?100?10?31??1????????????????????????????????????????????????????????????????01???????0???????????????????????????1??????????????????????0????????????????????????????????????????????????????????????????????????????????? 
Thalassodromeus_sethi            2?100?10101001??1??100124110?1100530120????010001100001220123010100110?11?1?110111011?111?000?100?011?1211000101??11??????????????????????0????????????????????????????????????????????????????????????????????????????????? 
Chaoyangopterus_zhangi           2?100?100010?2?????1?0?????1??0???????0???????????????????1????????????????????????????111000?1101001??????????1???1??????????????????????0?00?12111??????????00?221110002??0011??10????1?1??4?11100??02011300000?01?121014? 
Jidapterus_edentus               2?100?10001002??1??1?0?????1??0???????0???????????????????1???101??????1??????00???????111000?1101001??????0?101??11??????????????????????0?00?12111????1??????0??21?10001???01??0???????110?4?1110011?3??13???11?111121??33 
Eoazhdarcho_liaoxiensis          ???????????00????????????????????????????????????????????????0??????????????????????????11000?1??1001?00010??10???11????????????????????????00?12?11??1????????0?22????00??0?01??0?080??111??4?2110??10????????????1???1???? 
Shenzhoupterus_chaoyangensis     2?1?0????01??2??1??10012?111?10???????0????1????1101?01301?2301?100020?11???1??????????111000?110???1??????001?1???1??????????????????????0????12?11?10???????00?22??????????01???1080??????0??21?0?1?0????????????1?1??014? 
Radiodactylus_langstoni          ??????????????????????????????????????????????????????????????????????????????????????????????????????????????????????????????????????????????????????????????????????????10001?01108011???????????????????????????????????? 
Microtuban_altivolans            ?????????????????????????????????????????????????????????????????????????????????????????????????????????????????????????????????????????????????????1???????100?22????????000110??08011??1??4?2110???0?????????????112?0??? 
Aralazhdarcho_bestobensis        ????????0???????0?????????????????????????????????????????????1?1??????1??????????????1????????????????????????????1??????????????????????????0???1??????????1001?????????????????????????????????????3?????????????112????? 
Volgadraco_bogolubovi            ???????????0???????????????????????????????????????????????????????????????????????????111000?1101?????00??????1???1????????????????????????01101101?11??????????????????????????????????????????????????????????????1?????? 
Eurazhdarcho_langendorfensis     ????????????????????????????????????????????????????????????????????????????????????????????????????????????????????????????????????????????00122?11?????????????????????????????????????????????1?0??3????????????????????? 
Montanazhdarcho_minor            ???????????0???????????????????????????????????????????????????????????????????????????11?000?1?0100??000??????0???1????????????????????????00?12?11?????????100122?010???11001101108001?110??1??100??0????????????????????? 
Phosphatodraco_mauritanicus      ????????????????????????????????????????????????????????????????????????????????????????????????????????????????????????????????????????????00022111?1?????????????????????????????????????????????????????????????????????? 
Zhejiangopterus_linhaiensis      2?100?10001??0?????100124110?10???????0????1????0????00?01123010101010?12???1???????0??111000?1101001??????01101???1??????????????????????01???22?110?1111100?00?22??10??1???01???1180??11???4?2?10?1?310113?1111?11?1210?4? 
Azhdarcho_lancicollis            2?100?100010?1?????1???????0?10??????????????????????????????0????????????????00??????1111000?1?01????00?????1?1???1??????????????????????0100122111?11??????100122101000?1?00110111801?11100?????00?13????????????111211??? 
OCP_DEK_GE_716                   ????????????????????????????????????????????????????????????????????????????????????????????????????????????????????????????????????????????0012211????????????????????????????????????????????????????????????????????????? 
Hatzegopteryx_thambema           ????????0?????????????????????????????????????????????????1??01?1??????121??0?????0?1?1?????????????????????????????????????????????????????????????????????????????????????001????18011???????????????????????????????????? 
Arambourgiania_philadelphiae     ????????????????????????????????????????????????????????????????????????????????????????????????????????????????????????????????????????????0012211??????????????????????????????????????????????????1?????????????????????? 
Quetzalcoatlus_spp               2?100?10001000??1??10012??10?11?16[23]0110????1???????100????12301?101010?1??????00??011?1111000?1001001?0001001101??11??????????????????????01001221110111?????100122111000?1100010111801111100412?100?13??113??1111111121014? 
Epapatelo_otyikokolo             ?????????????????????????????????????????????????????????????????????????????????????????????????????????????????????????????????????????????????????????????????????????????000003?????010?????????????????????????????????  
; 
nstates stand;
ccode + 53 63.64 79 83 85 97 101 110.111 119 139.140 158 160 167 174.175 177 180 183.185 194 206 213 242 250 265 269.270;

cnames 
{0 Skull_aspect_ratio,_length_relative_to_height_at_most_posterior_point_preserved_between_anterior_margin_of_external_naris_or_nasoantorbital_fenestra_and_jaw_articulation_exclusive_of_cranial_crests:_continuous; 
{1 Skull,_length_to_squamosal_relative_to_dorsal_vertebra_length:_continuous; 
{2 Mandble,_length_relative_to_skull_length_to_squamosal:_continuous; 
{3 Rostrum,_length_to_external_naris_(or_nasoantorbital_fenestra)_relative_to_skull_length_to_squamosal:_continuous; 
{4 External_naris,_length_relative_to_skull_length_to_squamosal:_continuous; 
{5 External_naris,_length_relative_to_height:_continuous; 
{6 Antorbital_fenestra,_length_relative_to_skull_length_to_squamosal:_continuous; 
{7 Antorbital_fenestra,_length_relative_to_height:_continuous; 
{8 Nasoantorbital_fenestra,_length_relative_to_skull_length_to_squamosal:_continuous; 
{9 Nasoantorbital_fenestra,_length_relative_to_height:_continuous; 
{10 Orbit,_length_relative_to_height:_continuous; 
{11 Supratemporal_fenestra,_length_relative_to_skull_length_to_squamosal:_continuous; 
{12 Subtemporal_fenestra,_length_relative_to_width:_continuous; 
{13 Basipterygoid_processes,_angle_divided_by_100:_continuous; 
{14 Rostral_tooth_row,_length_to_posterior_margin_relative_to_skull_length_to_squamosal:_continuous; 
{15 Teeth,_maximum_number_divided_by_1000:_continuous; 
{16 Mandibular_symphysis,_length_relative_to_mandible_length:_continuous; 
{17 Mandible_length,_relative_to_ramus_mid-depth:_continuous; 
{18 Mandibular_crest,_length_relative_to_mandible_length:_continuous; 
{19 Mandibular_tooth_row,_length_relative_mandible_length:_continuous; 
{20 Mid-cervical_vertebra,_maximum_length_relative_to_mid-width:_continuous; 
{21 Mid-cervical_vertebra,_maximum_length_relative_to_dorsal_vertebra_length:_continuous; 
{22 Dorsal_vertebra,_length_relative_to_maximum_diameter:_continuous; 
{23 Synsacral_verebra,_number:_continuous; 
{24 Caudal_vertebra,_length_relative_to_dorsal_vertebra_length:_continuous; 
{25 Caudal_vertebra,_length_relative_to_diameter:_continuous; 
{26 Scapula,_length_relative_to_coracoid_length:_continuous; 
{27 Deep_coracoid_flange,_length_relative_to_coracoid_length:_continuous; 
{28 Humerus,_length_relative_to_dorsal_vertebra_length:_continuous; 
{29 Humerus,_deltopectoral_crest,_proximodistal_constriction_width_relative_to_anterior_terminus_proximodistal_width:_continuous; 
{30 Ulna_or_radius,_length_relative_to_humerus_length:_continuous; 
{31 Radius,_diameter_relative_to_ulna_diameter:_continuous; 
{32 Pteroid,_length_relative_to_ulna_length:_continuous; 
{33 Metacarpal_IV,_length_relative_to_humerus_length:_continuous; 
{34 Metacarpal_IV_mid-width_relative_to_combined_ulna_and_radius_mid-width:_continuous; 
{35 Metacarpal_IV_proximal_end,_dorsoventral_width_relative_to_mid-width:_continuous; 
{36 Manual_digit_IV_first_phalanx,_length_relative_to_humerus_length:_continuous; 
{37 Manual_digit_IV_second_phalanx,_length_relative_to_first_phalanx_length:_continuous; 
{38 Manual_digit_IV_third_wing_phalanx,_length_relative_to_first_phalanx_length:_continuous; 
{39 Manual_digit_IV_fourth_wing_phalanx,_length_relative_to_first_phalanx_length:_continuous; 
{40 Prepubis,_length_relative_to_width:_continuous; 
{41 Pubis,_dorsoventral_depth_relative_to_acetabulum_anteroposterior_length:_continuous; 
{42 Ilium_anterior_process,_length_relative_to_posterior_process_length:_continuous; 
{43 Femur,_length_relative_to_humerus_length:_continuous; 
{44 Tibia,_length_relative_to_femur_length:_continuous; 
{45 Fibula,_free_length_relative_to_tibia_length:_continuous; 
{46 Metatarsal_III,_length_relative_to_tibia_length:_continuous; 
{47 Pedal_digit_III_second_phalanx_length,_relative_to_mid-width:_continuous; 
{48 Pedal_digit_IV_first_phalanx,_length_relative_to_mid-width:_continuous; 
{49 Pedal_digit_IV_second_phalanx,_length_relative_to_mid-width:_continuous; 
{50 Pedal_digit_IV_third_phalanx,_length_relative_to_mid-width:_continuous; 
{51 Rostrum_anterior_margin,_shape:	
	flat_surface	
	blunt	
	sharp_tip	
	rostral_process;
{52 Rostral_process_cross-section,_shape:	
	triangular	
	elliptical;
{53 Rostrum_anterior_end,_orientation:_ordered	
	upturned	
	straight	
	downturned;
{54 Palate_anterior_end,_fossa:	
	absent	
	present;
{55 Rostrum,_anterior_end,_lateral_expansion:	
	absent	
	present;
{56 Jaws,_anterior_expansion,_horizontal_outline_shape:	
	elliptical	
	triangular	
	quadrangular;
{57 Rostrum,_anterior_occlusal_margins,_shape:	
	rounded_edges	
	sharp_or_ridged;
{58 Rostrum,_middle_expansion:	
	absent	
	present;
{59 Rostrum,_posterior_occlusal_margins,_shape:	
	rounded	
	sharp_or_ridged;
{60 Rostrum,_shape:	
	laterally_attenuated	
	anteroposteriorly_shortened	
	dorsoventrally_depressed	
	laterally_flattened;
{61 Rostrum,_dorsal_taper:	
	subparallel	
	attenuated;
{62 Jaws,_anterior_end,_lateral_taper:	
	attenuated	
	subparallel;
{63 Skull,_entire_margin,_lateral_shape:	
	concave	
	straight_attenuated	
	convex;
{64 Skull_dorsal_margin,_curvature_exclusive_of_cranial_crests:_ordered	
	convex	
	straight	
	concave;
{65 External_naris_dorsal_and_ventral_margins,_orientation:	
	acute_angle	
	subparallel;
{66 External_naris_(or_nasoantorbital_fenestra)_anterior_margin,_position_relative_to_premaxillary_toothrow:	
	dorsal	
	posterior;
{67 Antorbital_(or_nasoantorbital)_fossa_on_jugal:	
	present	
	absent;
{68 Antorbital_fenestra_dorsal_and_ventral_margins,_orientation:	
	subparallel	
	acute_angle;
{69 Antorbital_fenestra_ventral_margin,_position_relative_to_external_naris_ventral_margin:	
	same_level	
	ventral;
{70 External_naris_and_antorbital_fenestra,_configuration:	
	separate	
	confluent;
{71 Antorbital_(or_nasoantorbital_fenestra)_posterior_margin,_shape:	
	subangular	
	beveled;
{72 Nasoantorbital_fenestra_dorsal_and_ventral_margins,_orientation:	
	acute_angle	
	subparallel;
{73 Orbit_outline,_shape:	
	subcircular	
	piriform	
	inverted_triangle;
{74 Orbit,_dorsal_position:	
	middle_of_the_skull_with_the_ventral_margin_of_the_orbit_below_the_middle_of_the_antorbital_(or_nasoantorbital)_fenestra_and_the_dorsal_margin_of_the_orbit_above_the_dorsal_margin_of_the_antorbital_(or_nasoantorbital)_fenestra	
	high_in_the_skull_with_the_ventral_margin_of_the_orbit_the_same_level_or_above_the_middle_of_the_antorbital_(or_nasoantorbital)_fenestra	
	low_in_the_skull_with_the_entire_orbit_lower_than_the_dorsal_margin_of_the_antorbital_(or_nasoantorbital)_fenestra;
{75 Infratemporal_fenestra,_shape:	
	trapezoidal	
	inverted_triangle	
	upright_triangle	
	oval	
	elliptical;
{76 Infratemporal_fenestra,_position_relative_to_orbit:	
	posterior_to_orbit	
	reaches_under_orbit;
{77 Infratemporal_fenestra,_orientation:	
	subvertical	
	inclined;
{78 Premaxillary_bar_(internasal_process),_width:	
	wide	
	narrow;
{79 Premaxilla,_maxillary_process,_position:_ordered	
	contacts_nasal	
	reaches_posterior_half_of_external_naris	
	anterior_to_middle_of_external_naris;
{80 Premaxilla,_posterior_process,_posterior_margin_position:	
	terminate_between_nasals	
	contacts_frontals;
{81 Premaxillary_crest:	
	absent	
	present;
{82 Premaxillary_crest_anterior_margin,_position_relative_to_skull_anterior_margin:	
	level	
	posterior;
{83 Premaxillary_crest_anterior_margin,_orientation:_ordered	
	inclined_posteriorly	
	subvertical	
	curving_anterodorsally;
{84 Premaxillary_crest,_shape:	
	tall_triangle_decreasing_in_height_posteriorly	
	low_blade	
	low_with_anterior_humped_margin	
	comb-like_with_straight_dorsal_margin	
	semicircular	
	tall_triangle_increasing_in_height_posteriorly	
	rectangular;
{85 Premaxillary_crest_posterior_margin,_position:_ordered	
	anterior_to_external_naris_(or_nasoantorbital_fenestra)_anterior_margin	
	between_external_naris_(or_nasoantorbital_fenestra)_anterior_margin_and_orbit	
	above_orbit	
	above_occipital_region;
{86 Premaxillary_crest_dorsal_spine:	
	absent	
	present;
{87 Premaxillary_crest,_thickness:	
	single_plate	
	two_plates_separated_by_trabeculae;
{88 Premaxillary_crest,_texture:	
	striated	
	smooth	
	branching_system_of_grooves;
{89 Maxilla_posterior_end,_shape:	
	narrow	
	ventrally_expanded;
{90 Maxilla_ascending_process,_shape:	
	broad	
	tapered	
	slender;
{91 Antorbital_fossa_on_maxilla:	
	present	
	absent;
{92 Maxilla_and_nasal_contact,_position:	
	maxilla_contacts_main_body_of_nasal	
	maxilla_contacts_only_descending_process_of_nasal;
{93 Maxilla,_premaxillary_and_jugal_processes,_shape:	
	jugal_process_wider	
	both_narrow	
	premaxillary_process_wider	
	both_wide;
{94 Nasal_descending_process:	
	present	
	absent;
{95 Nasal_descending_process,_position:	
	lateral	
	medial;
{96 Nasal_descending_process,_length:	
	short	
	elongate;
{97 Nasal_descending_process,_orientation:_ordered	
	inclined_anteriorly	
	ventral	
	inclined_posteriorly;
{98 Nasal_process,_lateral_pneumatic_foramen:	
	absent	
	present;
{99 Frontal_crest:	
	absent	
	present;
{100 Frontal_crest,_shape:	
	low_and_blunt	
	low_and_elongated	
	high_and_expanded;
{101 Frontal_crest_anterior_margin,_position:	
	anterior_to_orbit	
	above_orbit	
	posterior_to_orbit;
{102 Frontal_anterior_margin,_position_relative_to_preorbital_bar_anterior_margin:	
	anterior	
	posterior;
{103 Lacrimal_foramen:	
	absent	
	present;
{104 Lacrimal_descending_process_posterior_margin,_shape:	
	flat	
	orbital_process;
{105 Parietal_crest:	
	absent	
	present;
{106 Parietal_crest,_shape:	
	blunt	
	expanded_into_rounded_margin	
	tapered_into_triangular_process	
	elongate_process;
{107 Squamosal,_shape:	
	unexpanded	
	rounded	
	expanded;
{108 Squamosal,_position:	
	above_base_of_lacrimal_process_of_jugal	
	below_or_level_with_base_of_lacrimal_process_of_jugal;
{109 Jugal_posterior_process:	
	present	
	absent;
{110 Quadrate,_inclination_relative_to_ventral_margin_of_skull:_ordered	
	anteriorly	
	subvertical	
	120˚_posteriorly	
	150˚_posteriorly;
{111 Mandibular_articulation,_position_relative_to_center_of_orbit:_ordered	
	posterior_to_orbit	
	posterior_to_center_below_orbit	
	underneath_center_below_orbit	
	anterior_to_center_below_orbit	
	anterior_to_orbit;
{112 Quadrate,_shape:	
	wide	
	thin_and_cylindrical;
{113 Jugal_ventral_margin,_shape:	
	straight	
	concave;
{114 Jugal_anterior_margin,_position_relative_to_nasoantorbital_fenestra_anterior_margin:	
	posterior	
	same_level_or_anterior;
{115 Jugal_maxillary_process:	
	absent	
	present;
{116 Jugal_postorbital_process_and_lacrimal,_configuration:	
	do_not_contact	
	contact_to_form_lower_orbital_bar;
{117 Jugal_ascending_and_postorbital_processes,_shape:	
	separated_by_distinct_angle	
	infilled_by_concave_flange;
{118 Jugal_ascending_process_base,_width:	
	broad	
	narrow;
{119 Jugal_ascending_process,_inclination:_ordered	
	anterodorsal	
	vertical	
	posterodorsal;
{120 Jugal_postorbital_process_anterior_margin,_shape:	
	flat	
	orbital_process;
{121 Jugal_posterior_process,_orientation:	
	posterior	
	ventral;
{122 Jugal_maxillary_process:	
	absent	
	present;
{123 Occiput,_orientation:_ordered	
	posterior	
	posteroventral	
	ventral;
{124 Basioccipital,_length_relative_to_width:	
	shorter_than_wide	
	longer_than_wide;
{125 Basisphenoid_body,_length:	
	shorter_than_wide	
	at_least_longer_than_wide;
{126 Elongate_basipterygoid_processes:	
	absent	
	present;
{127 Supraoccipital_crest:	
	absent	
	present;
{128 Supraoccipital,_pneumatic_foraminae:	
	absent	
	present;
{129 Palate,_posterior_end,_shape:	
	concave	
	convex;
{130 Palatal_ridge:	
	absent	
	present;
{131 Palatal_ridge,_position:	
	tapering_anteriorly	
	confined_posteriorly;
{132 Palatal_ridge_shape:	
	narrow_strip	
	strong_keel;
{133 Palatines,_shape:	
	broad_and_flat	
	thin_bars;
{134 Internal_nares_and_maxilla,_configuration:	
	contact	
	do_not_contact;
{135 Pterygoids,_ventral_position_relative_to_jaw_margin:	
	level_or_dorsal	
	ventral;
{136 Interpterygoid_opening,_length_relative_to_subtemporal_fenestra_length:	
	at_least_subtemporal_fenestra	
	shorter_than_subtemporal_fenestra;
{137 Mandible_articulation_condyles,_orientation:	
	parasagittal	
	oblique;
{138 Foramina_positioned_in_a_row_along_the_lateral_margin_of_the_jaws:	
	present	
	absent;
{139 Mandible_anterior_end,_orientation:_ordered	
	upturned	
	straight	
	downturned;
{140 Mandible_anterior_margin,_shape:	
	blunt	
	sharp_tip	
	prow;
{141 Mandible_anterior_end,_shape:	
	compressed_laterally	
	shortened_anteroposteriorly	
	depressed_dorsoventrally	
	_;
{142 Mandible,_anterior_expansion:	
	absent	
	present;
{143 Mandible_anterior_end_dorsal_jaw_margins,_shape:	
	level	
	eminence;
{144 Mandible_anterior_end_distinct_eminence,_height:	
	low	
	high;
{145 Mandibular_symphysis,_fusion:	
	unfused	
	fused;
{146 Mandibular_symphysis,_orientation:	
	subparallel_to_rami	
	oblique_to_rami;
{147 Mandible,_anterior_end_lateral_surfaces,_texture:	
	flat	
	large_foramina	
	pitted;
{148 Mandible,_anterior_occlusal_margins,_shape:	
	rounded_edges	
	sharp_or_ridged;
{149 Mandible,_distinct_middle_expansion:	
	absent	
	present;
{150 Mandible,_posterior_occlusal_margins,_shape:	
	rounded	
	sharp_or_ridged;
{151 Mandibular_rami_distinct_dorsal_eminence:	
	present	
	absent;
{152 Mandibular_rami_dorsal_eminence,_shape:	
	rounded	
	pointed;
{153 Mandibular_sulcus:	
	absent	
	present;
{154 Mandible_symphysis_occlusal_surface_anterior_end,_shape:	
	flat_or_concave	
	fossa	
	keel;
{155 Mandible,_dorsal_surface,_parasagittal_ridges:	
	absent	
	present;
{156 Mandible,_symphyseal_cavity:	
	absent	
	present;
{157 Mandibular_symphyseal_cavity,_dorsal_shelf,_posterior_margin_relative_to_ventral_symphysis_posterior_margin:	
	dorsal_shelf_posterior_margin_extends_posterior_to_ventral_symphysis_posterior_margin	
	ventral_shelf_posterior_margin_extends_at_least_posterior_to_dorsal_symphysis_posterior_margin;
{158 Mandibular_rami_dorsal_margin,_shape:_ordered	
	convex	
	straight	
	concave;
{159 Mandibular_rami,_orientation:	
	straight_to_upturned	
	downcurved;
{160 Retroarticular_process,_orientation_relative_to_mandible:_ordered	
	posteroventral	
	subhorizontal	
	posterodorsal;
{161 Retroarticular_process,_shape:	
	triangular	
	subcircular	
	elongate	
	blunt;
{162 Mandible_ventral_margin,_shape:	
	flat	
	keel	
	crest;
{163 Mandibular_crest,_shape:	
	blade_like_and_low	
	massive_and_deep;
{164 Mandibular_crest_anterior_margin,_position:	
	posterior_to_mandible_anterior_margin	
	mandible_anterior_margin;
{165 Dentary,_length:	
	do_not_separate_angular_and_surangular	
	separate_angular_and_surangular;
{166 Teeth:	
	present	
	absent;
{167 Teeth,_spacing_along_jaws:_ordered	
	mesial_teeth_spaced_wider_apart	
	even_along_the_jaws	
	distal_teeth_spaced_wider_apart;
{168 Teeth,_variation_in_shape_along_tooth_row:	
	isodont	
	heterodont;
{169 Mesial_heterodont_teeth,_shape:	
	recurved_triangle	
	slender_needle	
	recurved_spike;
{170 Teeth,_shape:	
	recurved_triangle	
	bulbous_triangle	
	slender_needle	
	recurved_cone	
	labiolingually_compressed_triangle	
	recurved_spike;
{171 Teeth,_texture:	
	smooth	
	striated	
	sharp_mesial_and_distal_keels	
	medial_carinae;
{172 Teeth,_maximum_crown_height_relative_to_basal_width:	
	less_than_four_times_width	
	at_least_four_times_width;
{173 Teeth,_lateral_orientation:	
	vertical	
	inclined_laterally;
{174 Mesial_teeth,_average_spacing_between_successive_teeth:	
	nearly_touching	
	at_most_diameter_of_teeth	
	more_than_diameter_of_teeth;
{175 Cheek_teeth,_average_spacing_between_successive_teeth:_ordered	
	nearly_touching	
	at_most_diameter_of_teeth	
	more_than_diameter_of_teeth;
{176 Teeth,_size_variation:	
	transition_along_tooth_row	
	disparity_in_size_between_mesial_and_distal_teeth;
{177 Upper_dentition,_size_relative_to_lower_dentition:_ordered	
	upper_dentition_significantly_larger	
	subequal	
	upper_dentition_significantly_smaller;
{178 Teeth,_maximum_curvature:	
	displacement_of_curvature_less_than_tooth_diameter	
	displacement_of_curvature_at_least_tooth_diameter;
{179 Teeth,_curvature_orientation:	
	posterior	
	lingual;
{180 Teeth,_inclination:_ordered	
	upright	
	mesial_teeth_procumbent	
	procumbent;
{181 Cheek_alveoli,_shape:	
	set_in_grooves	
	low	
	undulating_occlusal_margins	
	raised_rims	
	inflated;
{182 Cheek_teeth,_denticles:	
	present	
	absent;
{183 Teeth_largest_denticles,_shape:_ordered	
	serrations	
	cuspules	
	crenulations	
	low_cusps	
	tall_cusps;
{184 Teeth,_maximum_denticle_number:_ordered	
	more_than_50 between_six_and_49 five;
{185 Rostral_tooth_row,_anterior_end,_position:	
	posterior_to_tip_of_rostrum	
	tip_of_rostrum	
	anterior_surface_of_rostrum;
{186 Maxillary_teeth,_position_of_largest_teeth:	
	mesial	
	middle	
	distal;
{187 Fifth_and_sixth_teeth,_distinctly_smaller_than_fourth_and_seventh_and_subequal_in_size:	
	absent	
	present;
{188 Mandibular_tooth_row,_anterior_end,_position:	
	tip_of_mandible	
	posterior_to_tip_of_mandible;
{189 Occlusal_margin,_orientation_with_respect_to_jaw_margin:	
	parallel	
	dorsally_reflected;
{190 Atlantoaxis,_fusion:	
	unfused	
	fused;
{191 Mid-cervical_vertebra_neural_arch_lateral_surface,_pneumatic_foramen:	
	absent	
	present;
{192 Mid-cervical_vertebra_centrum_lateral_surface,_pneumatic_foramen:	
	absent	
	present;
{193 Cervical_vertebra_lateral_to_neural_canal,_pneumatic_foramina:	
	absent	
	present;
{194 Mid-cervical_vertebra_neural_spines,_height:_ordered	
	tall	
	low	
	extremely_reduced;
{195 Mid-cervical_vertebrae_neural_spines,_lateral_outline_shape:	
	blade	
	triangular	
	ridge	
	fan;
{196 Mid-cervical_vertebra,_postexapophyses:	
	absent	
	present;
{197 Mid-cervical_vertebra_neural_arch_and_centrum,_configuration:	
	distinct	
	confluent;
{198 Mid-cervical_vertebra_ribs,_shape:	
	elongate	
	reduced;
{199 Cervical_8_neural_spine,_height:	
	tall	
	low;
{200 Cervical_9,_shape:	
	similar_to_dorsal_vertebrae	
	similar_to_cervicals;
{201 Notarium:	
	absent	
	present;
{202 Anterior_dorsal_vertebra_neural_spines,_shape:	
	unfused	
	supraneural_plate;
{203 Sacral_ribs,_configuration:	
	contact_at_ilium	
	contact_medial_to_ilium;
{204 Synsacral_supraneural_plate:	
	absent	
	present;
{205 Caudal_vertebra,_number:	
	more_than_15 at_most_15;
{206 Caudal_vertebra_zygapophyses,_length:	
	short	
	elongate	
	extremely_elongate;
{207 Caudal_vertebra_centrum,_shape:	
	single	
	duplex;
{208 Scapulocoracoid,_orientation_relative_to_vertebral_column:	
	subparallel	
	rotated_laterally;
{209 Scapula_proximal_end,_shape:	
	elongate_andcompressed	
	suboval_and_expanded;
{210 Scapula,_shape:	
	elongate_process	
	stout_with_constricted_shaft;
{211 Scapula_articulates_with_vertebral_column:	
	absent	
	present;
{212 Coracoid_ventral_margin,_shape:	
	rounded	
	broad_tubercle	
	deep_flange;
{213 Coracoid,_shape:_ordered	
	semicircular	
	broad_shaft	
	narrow_shaft;
{214 Sternocoracoid_articulations,_position_with_respect_to_one_another:	
	lateral	
	anterior_and_posterior;
{215 Sternum,_constriction_posterior_to_sternocoracoid_articulations:	
	present	
	absent;
{216 Cristopine,_shape:	
	shallow	
	deep;
{217 Cristospine,_length:	
	stout	
	elongate;
{218 Sternocoracoid_articulations,_shape:	
	flattened	
	oval;
{219 Sternocoracoid_articulations,_posterior_expansion:	
	absent	
	present;
{220 Sternum_plate,_shape:	
	narrow	
	quadrangular	
	semicircular	
	triangular	
	laterally_expanded;
{221 Humerus_proximal_end_ventral_surface,_pneumatic_foramen:	
	absent	
	present;
{222 Humerus_proximal_end,_cross_section:	
	crescent	
	horseshoe;
{223 Humerus_proximal_end_dorsal_surface,_pneumatic_foramen:	
	absent	
	present;
{224 Humerus_shaft,_shape:	
	straight	
	bowed;
{225 Humerus,_mid-shaft,_shape:	
	tapered	
	subcylindrical;
{226 Humerus_entepicondyle,_anteroposterior_width_relative_to_ectepicondyle_anteroposterior_width:	
	entepicondyle_wider_than_ectepicondyle	
	ectepicondyle_at_most_entepicondyle_width;
{227 Humerus,_between_distal_condyles,_pneumatic_foramen:	
	absent	
	present;
{228 Humerus_distal_aspect,_pneumatic_foramen:	
	absent	
	present;
{229 Humerus_distal_aspect,_shape:	
	hourglass	
	crescentic_or_D-shape	
	triangular	
	trapezoidal;
{230 Deltopectoral_crest,_position_on_humerus:	
	proximal	
	more_distally_on_shaft;
{231 Humerus_deltopectoral_crest,_shape:	
	subtriangular_with_proximal_apex	
	proximally_leaning_trapezoid	
	proximally_curving_hook	
	oblong_process_with_constricted_neck	
	low_and_rectangular	
	elongate_and_proximally_expanded	
	hatchet-shape	
	distally_leaning_trapezoid	
	tall_rectangular_process;
{232 Humerus_deltopectoral_crest,_curvature:	
	parallel_to_shaft	
	warped_distally;
{233 Ulnar_crest_of_humerus,_size:	
	reduced	
	developed;
{234 Humerus_ulnar_crest,_orientation:	
	posterior	
	ventral;
{235 Ulna_shaft_proximal_anterior_surface,_shape:	
	flat	
	longitudinal_ridge;
{236 Ulna_distal_tubercle,_position:	
	middle_of_the_distal_end	
	ventral_part_of_the_distal_end;
{237 Radius_distal_end_cross-section,_shape:	
	suboval	
	subtriangular_with_large_anterior_process;
{238 Distal_syncarpal_ventral_articular_facet_for_Metacarpal_IV,_size_relative_to_dorsal_facet:	
	ventral_facet_larger	
	subequal_in_size;
{239 Distal_syncarpal,_cross-section_shape:	
	rectangular	
	triangular;
{240 Pteroid,_shape:	
	angled_at_midsection	
	stout_hook	
	straight_and_tapered_with_expanded_proximal_end	
	straight_with_expanded_ends	
	curved_slender_rod	
	curved_and_subparallel-sided;
{241 Preaxial_carpal,_shape:	
	longer_than_wide	
	at_most_long_as_wide;
{242 Metacarpals,_number_articulating_with_carpus:_ordered	
	four_or_more	
	two	
	one;
{243 Metacarpals_I_to_III_distal_ends,_positions:	
	disparate	
	approximate;
{244 Metacarpal_IV_proximal_cross-section,_shape:	
	anteroposteriorly_compressed	
	subrectangular;
{245 Metacarpal_IV_shaft_cross-section,_shape:	
	rounded_rectangle	
	anteroposteriorly_compressed_oval;
{246 Metacarpal_distal_end_between_condyles,_shape:	
	flat	
	median_ridge;
{247 Manual_unguals,_size_relative_to_pedal_unguals:	
	less_than_twice_the_size_of_pedal_unguals	
	at_least_twice_the_size_of_pedal_unguals;
{248 Manual_digit_IV_first_phalanx_proximal_end_ventral_surface,_pneumatic_foramen:	
	absent	
	present;
{249 Manual_digit_IV_second_or_third_phalanges_shaft_cross-sections,_shape:	
	round_to_subtriangular	
	concave_posteriorly	
	oval	
	ventral_ridge;
{250 Pubis_anterior_margin,_shape_in_lateral_view:_ordered	
	convex	
	straight	
	slightly_concave	
	deeply_concave;
{251 Pubis_and_ischium_contact,_shape:	
	confluent_along_length	
	partially_separated_by_oval_opening;
{252 Ischium_ventral_margin,_shape:	
	straight	
	convex;
{253 Prepubis_shaft,_constriction:	
	absent	
	present;
{254 Prepubis,_shape:	
	elongate_paddle	
	medially_curved_with_short_lateral_process	
	triradiate	
	expanded_fan;
{255 Ilium_preactetabular_anterior_margin,_shape:	
	rounded	
	pointed;
{256 Ilium_preacetabular_process,_orientation:	
	straight	
	dorsiflected;
{257 Ilium_postacetabular_process,_orientation:	
	subhorizontal	
	posterodorsal;
{258 Ilium_postacetabular_process_shaft,_constriction:	
	absent	
	present;
{259 Ilium_postacetabular_process,_terminal_expansion:	
	absent	
	present;
{260 Acetabulum,_shape:	
	anteroposteriorly_ovate	
	subcircular;
{261 Ilium_postacetabular_process_apex,_shape:	
	flat	
	torus;
{262 Femur,_shape:	
	strongly_bowed	
	slight_curvature;
{263 Femur_proximal_end,_pneumatic_foramen:	
	absent	
	present;
{264 Femoral_neck,_shape:	
	indistinct	
	constricted;
{265 Greater_trochanter,_shape:_ordered	
	reduced	
	distinct_process	
	anteriorly-curved_hook;
{266 Femur_distal_end,_epicondyles_size:	
	reduced_and_confluent_with_distal_condyles	
	expanded_into_distinct_distal_flanges;
{267 Femoral_head,_angle_relative_to_shaft:	
	at_most_145°	
	greater_than_145°;
{268 Metatarsal_IV,_length_relative_to_metatarsals_I_to_III:	
	subequal	
	significantly_shorter;
{269 Pedal_digit_V,_number_of_phalanges:_ordered	
	four	
	three	
	two	
	one	
	zero;
{270 Pedal_digit_V_ultimate_phalanx,_shape:_ordered	
	straight	
	curved	
	bent_at_midsection	
	nubbin;
nstates stand;
hold 130000;
collapse auto;
mult= replic 1000 keepall;
best;
procedure/;
	
	
